# Supplementary material for: Uncovering Buffered Pleiotropy: A Genome-Scale Screen formel-28Genetic Interactors inCaenorhabditis elegans
Source: Oxford University Press journal article supplement (doi:10.1534/g3.113.008532), 2013-12-04
Supplement: 008532_008532si.pdf [file 008532_008532si.pdf]

**Uncovering Buffered Pleiotropy: A Genome-Scale Screen for *mel-28* Genetic Interactors in *Caenorhabditis elegans***

Anita G. Fernandez\*, Emily K. Mis<sup>§</sup>, Allison Lai\*, Michael Mauro\*, Angela Quental\*, Carly Bock\*, and Fabio Piano<sup>§#</sup>

\* Fairfield University Biology Department, Fairfield, CT, 06824

<sup>§</sup> New York University Department of Biology and Center for Genomics and Systems Biology, New York, NY 10003

<sup>#</sup> New York University, Abu Dhabi, United Arab Emirates

**DOI: 10.1534/g3.113.008532**

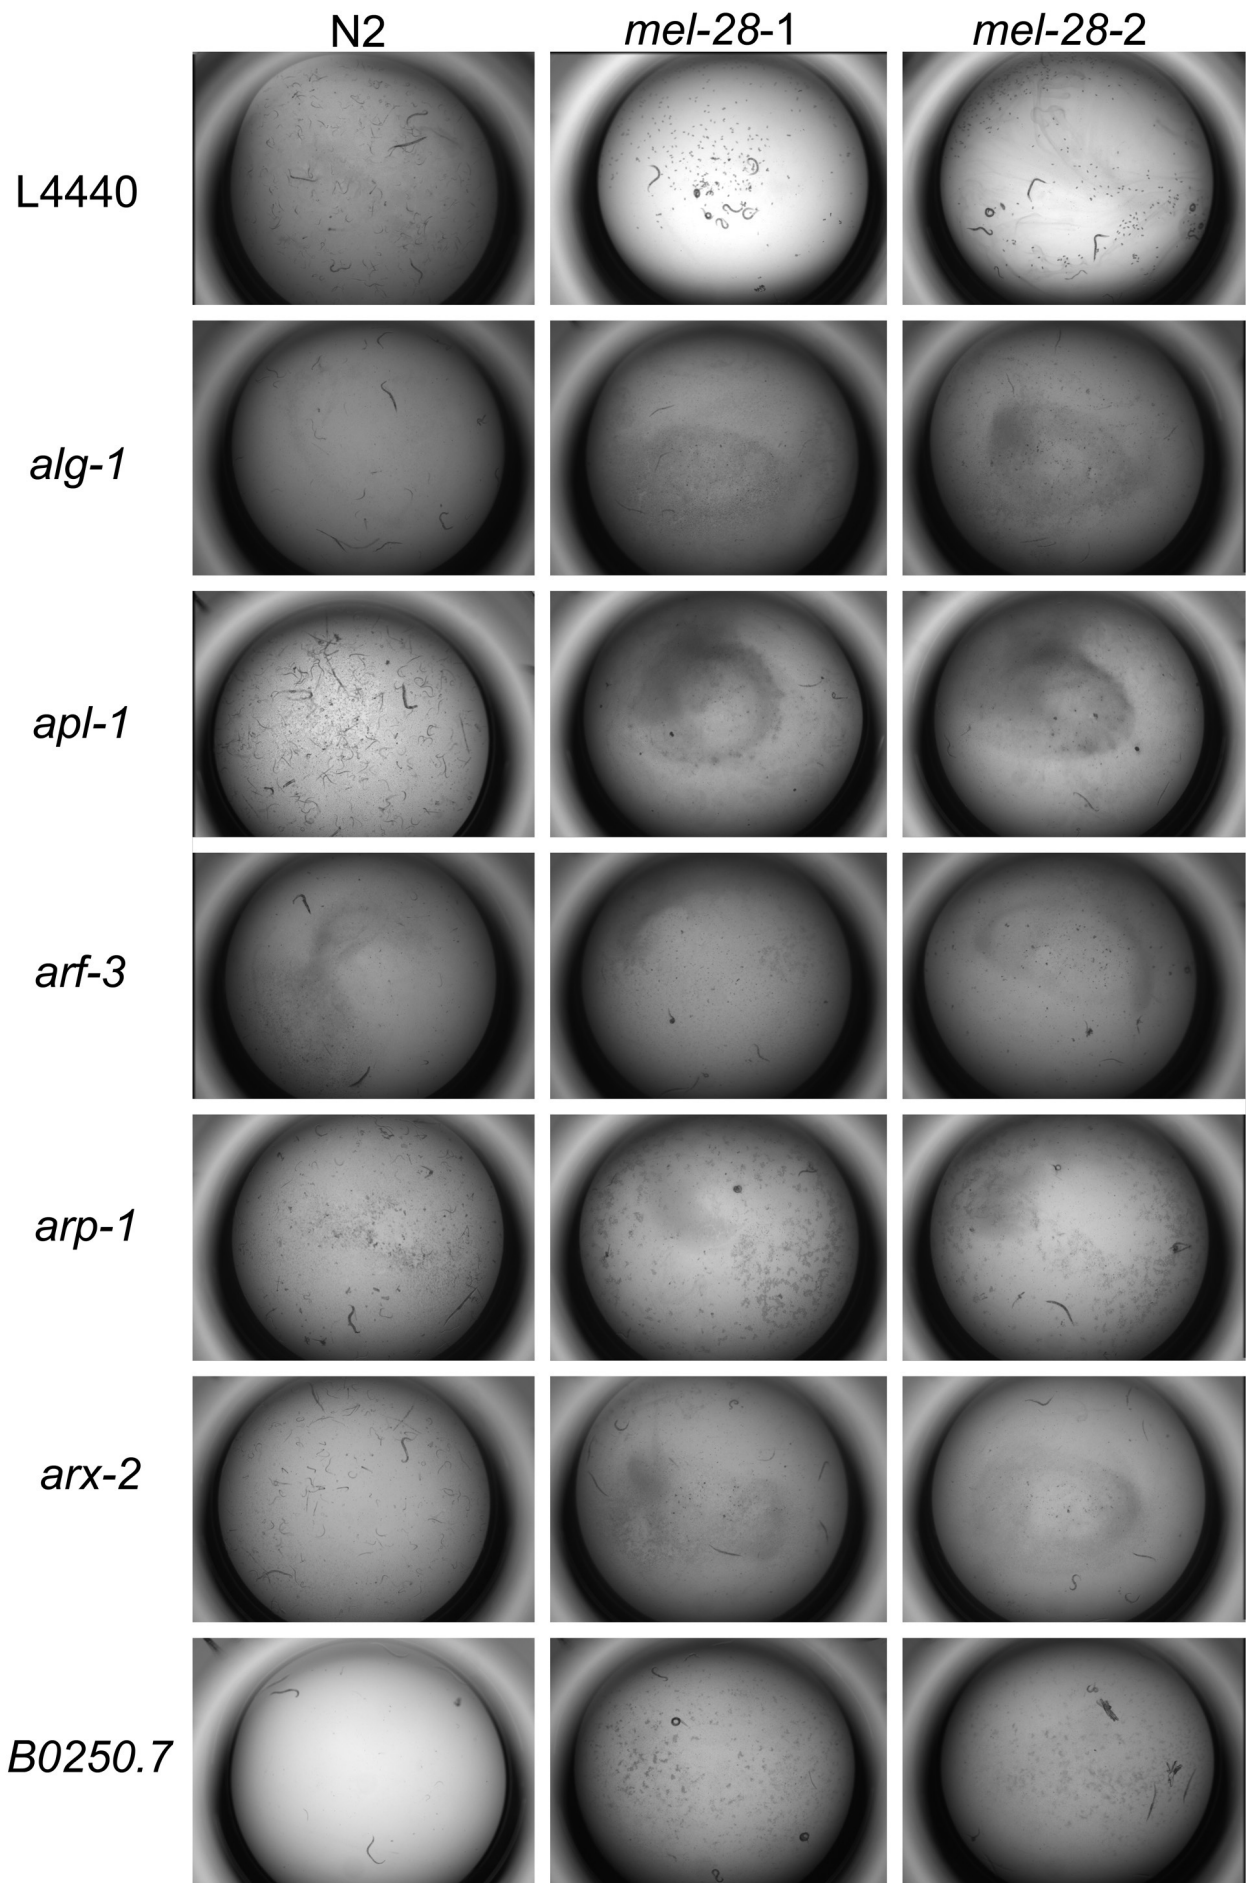

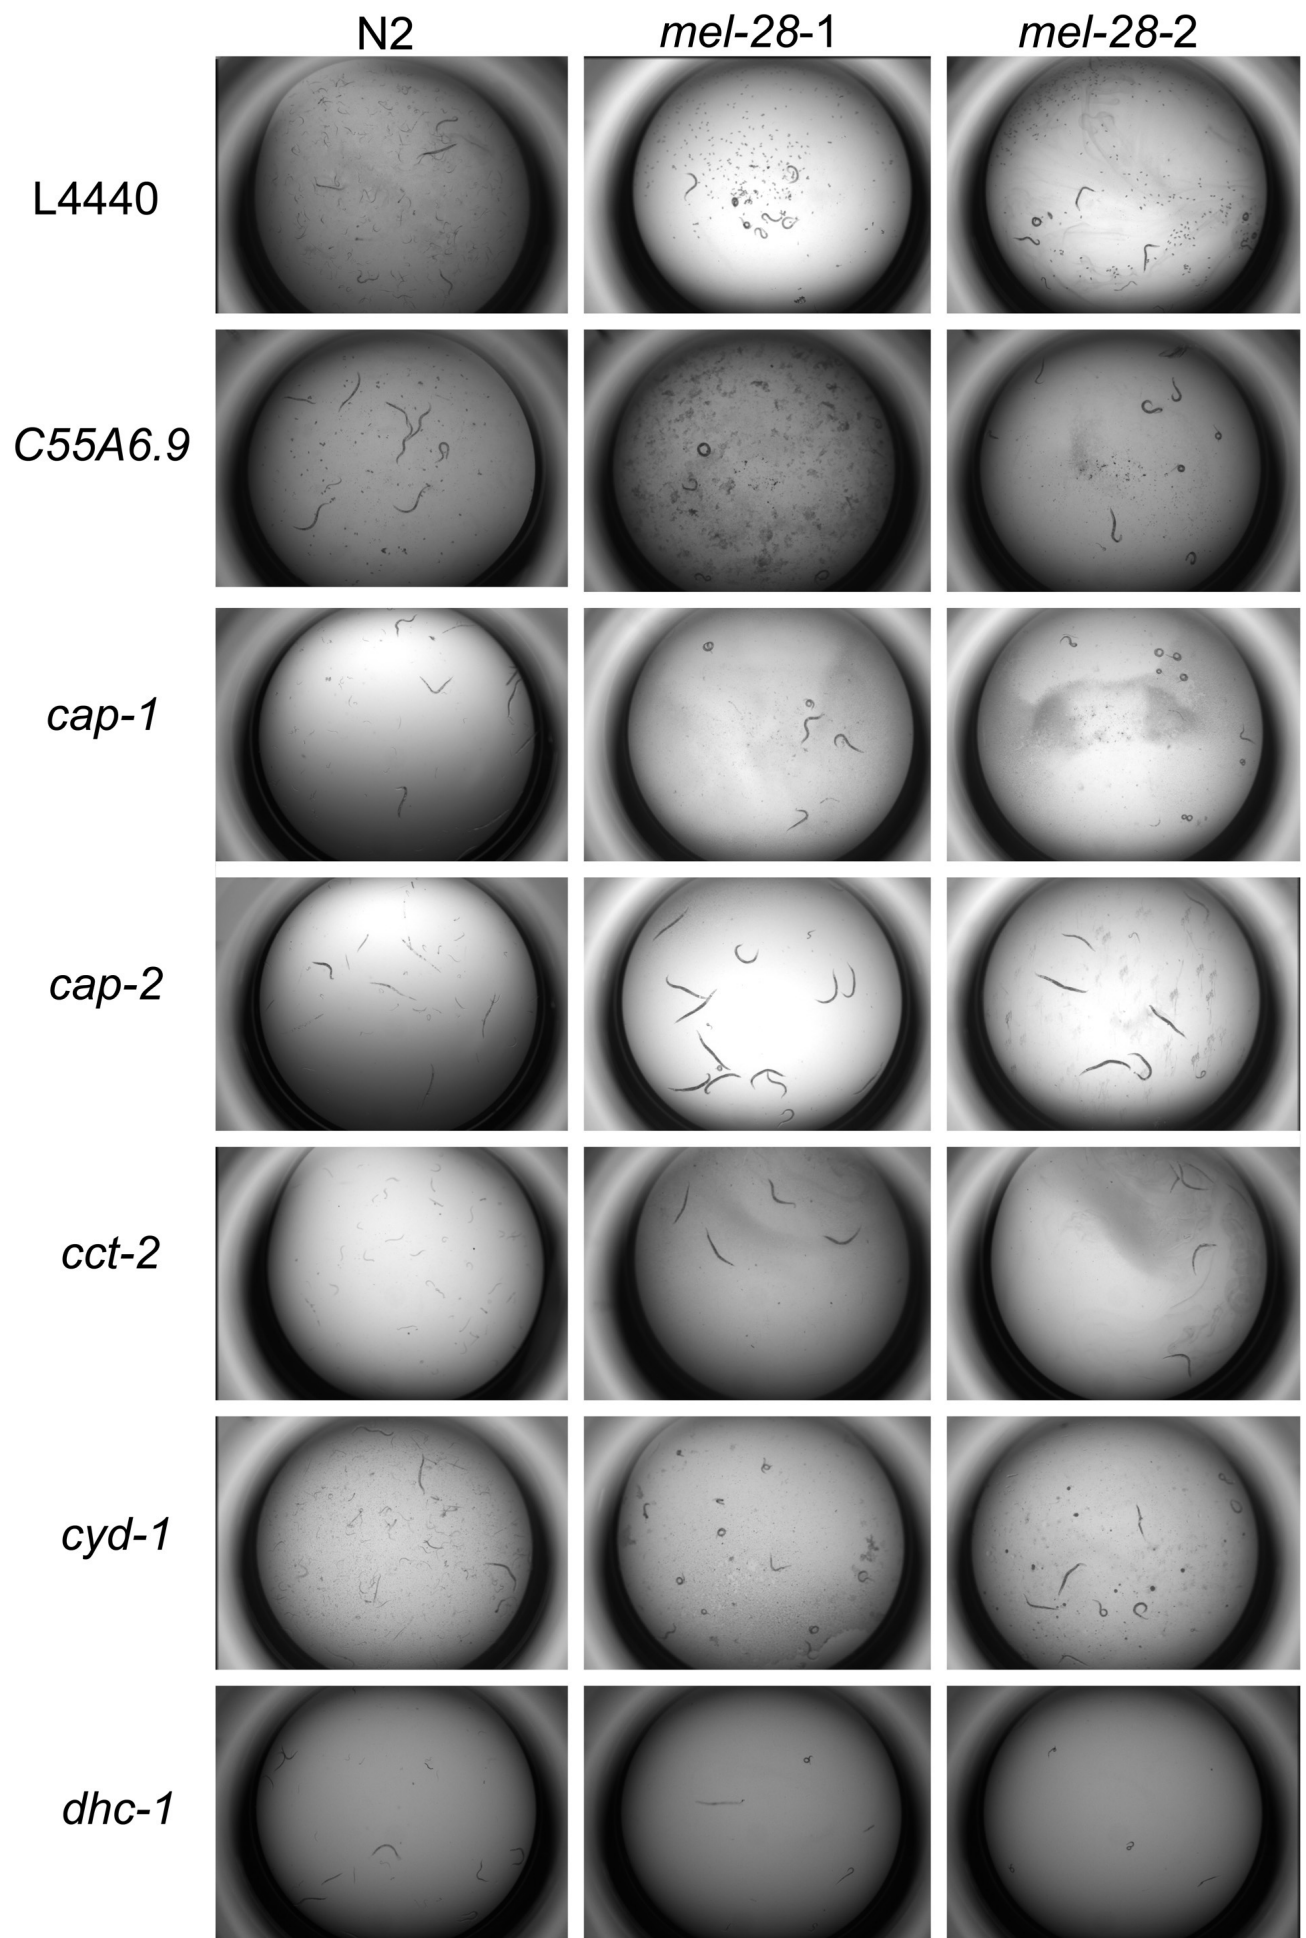

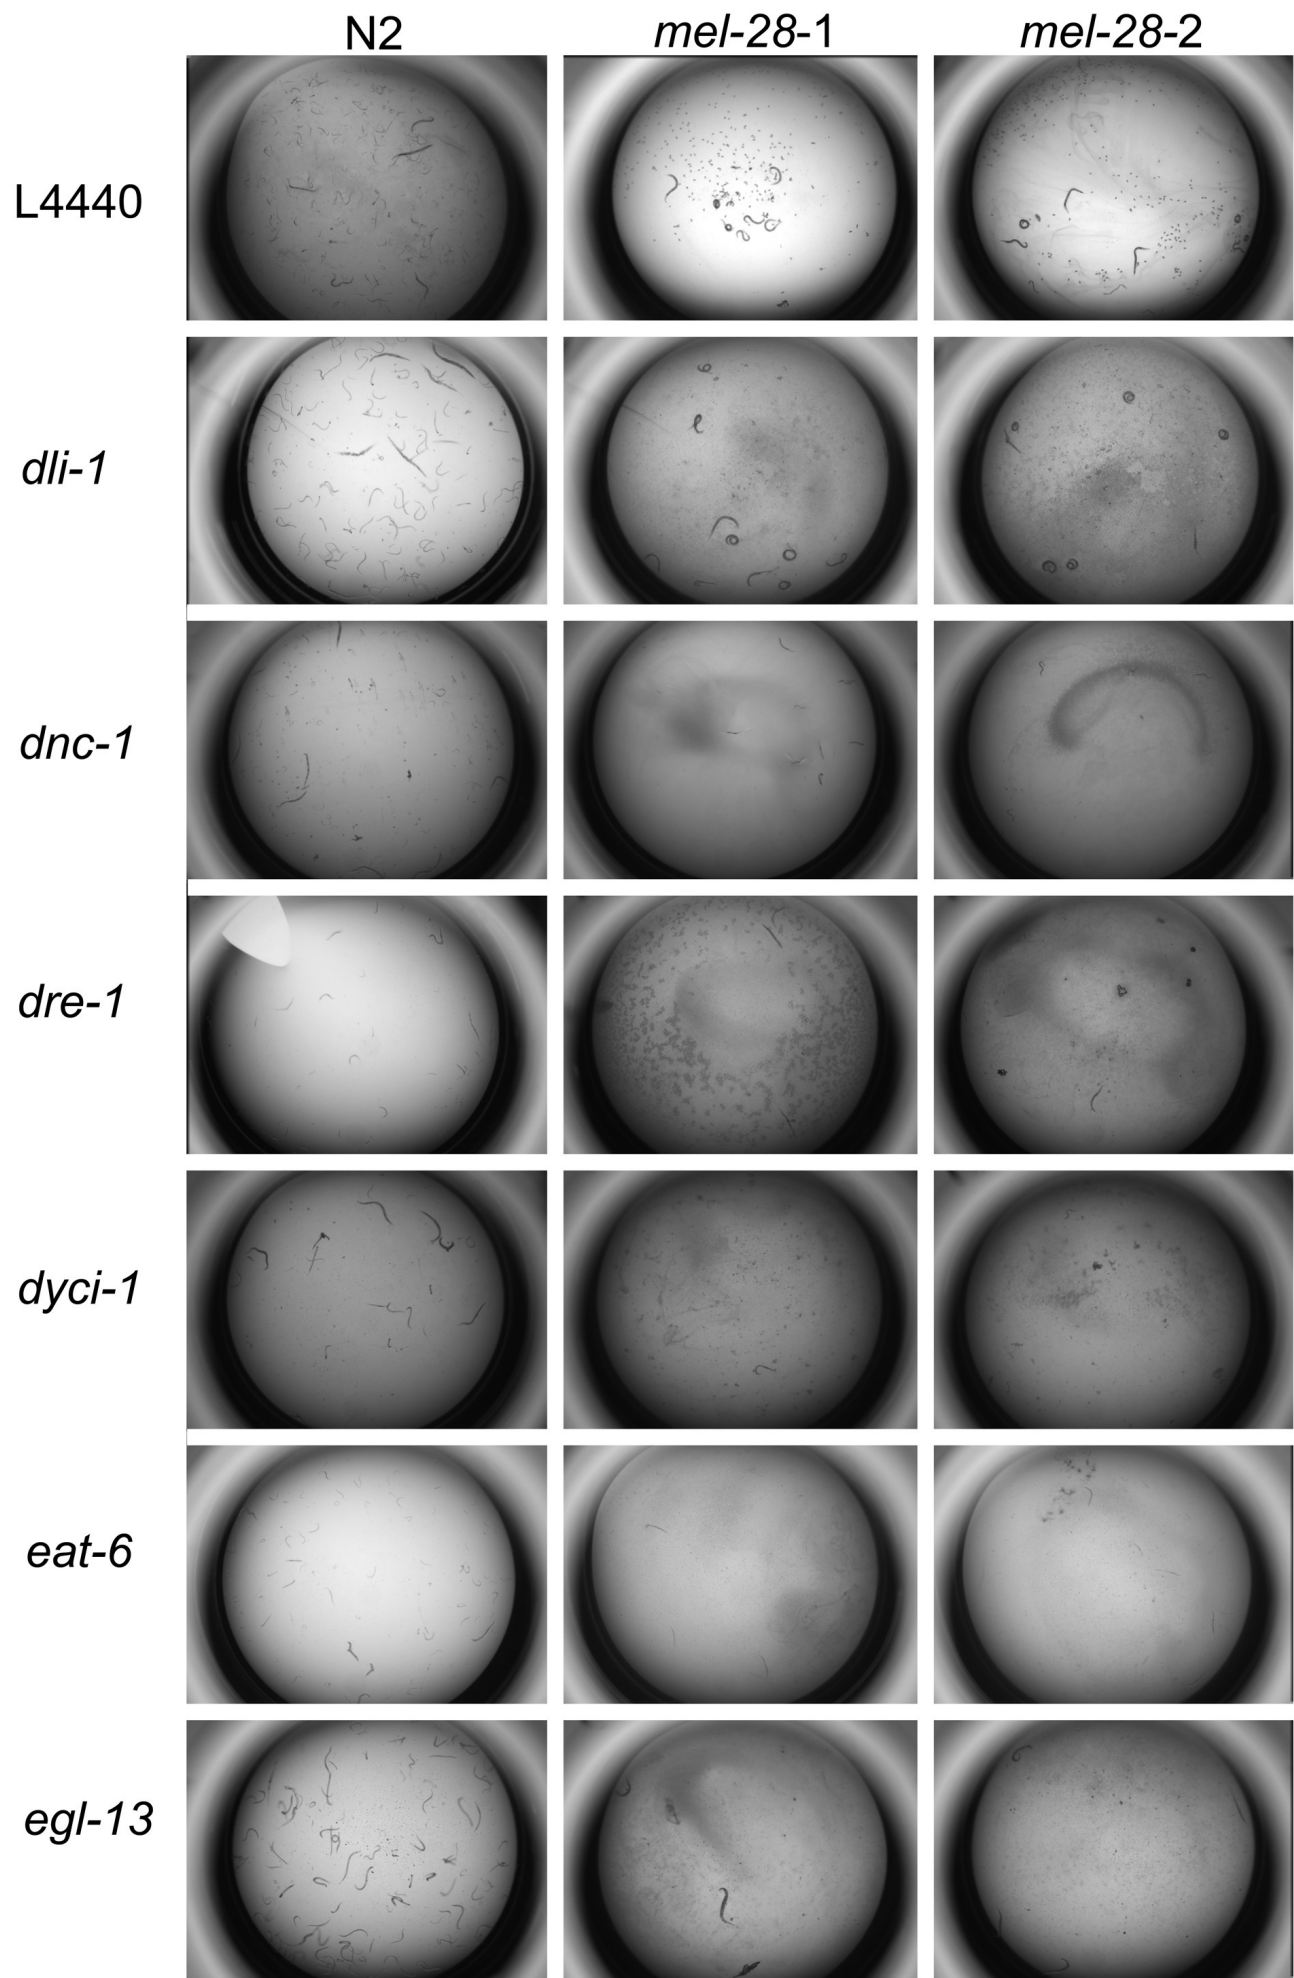

N2

*mel-28-1*

*mel-28-2*

L4440

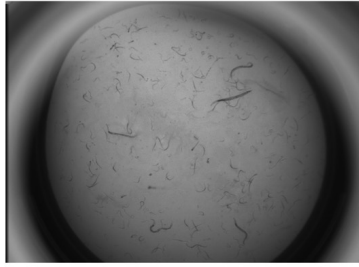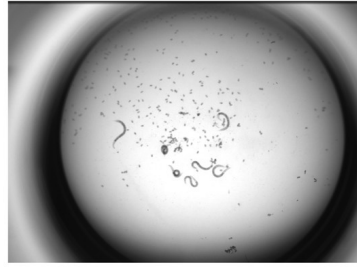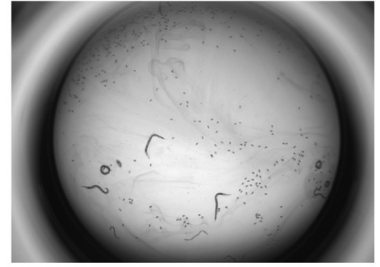

*ego-2*

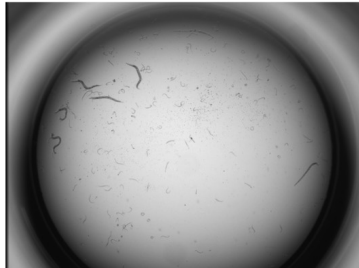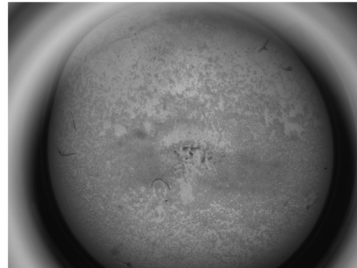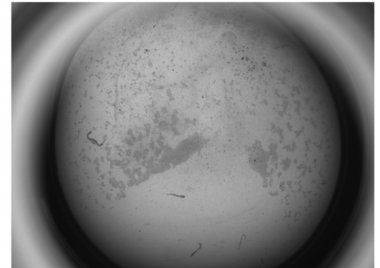

*eif-1*

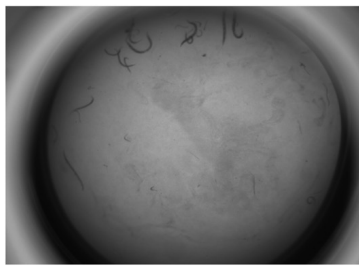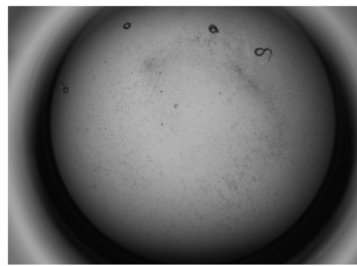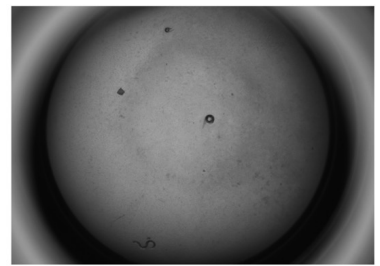

*exos-3*

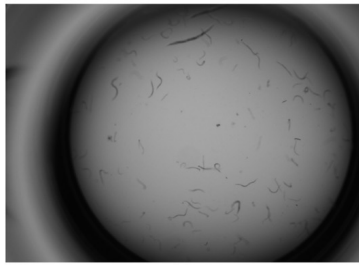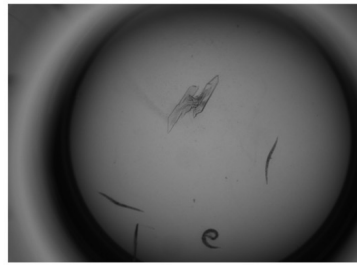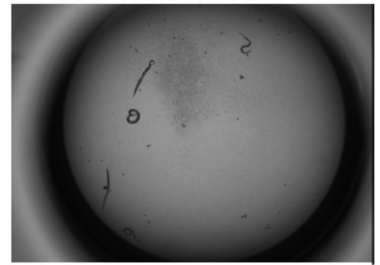

F19B6.1

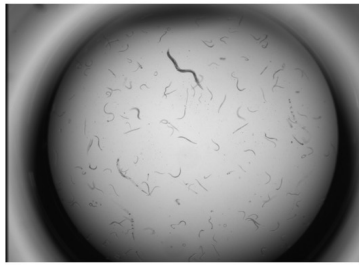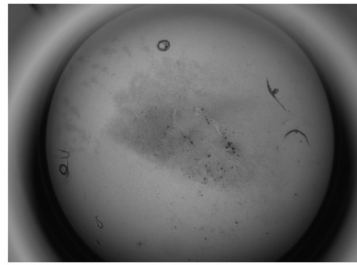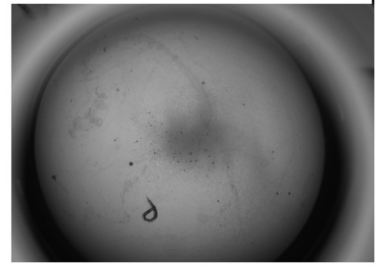

F52C6.2

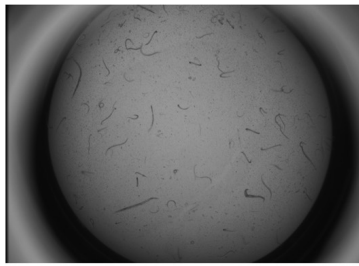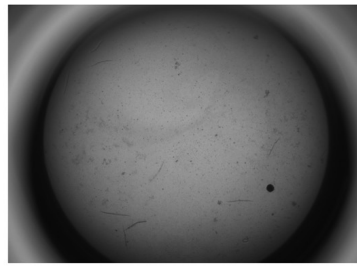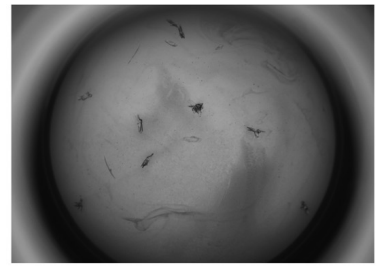

F52C6.3

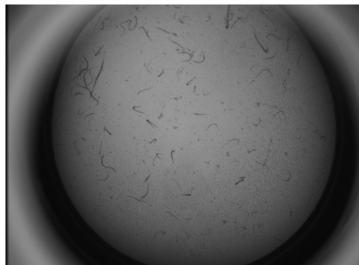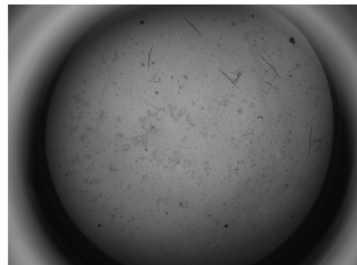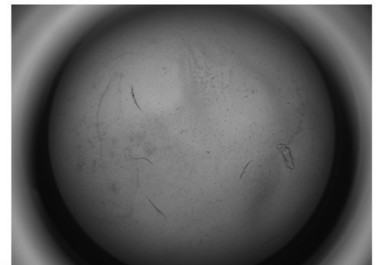

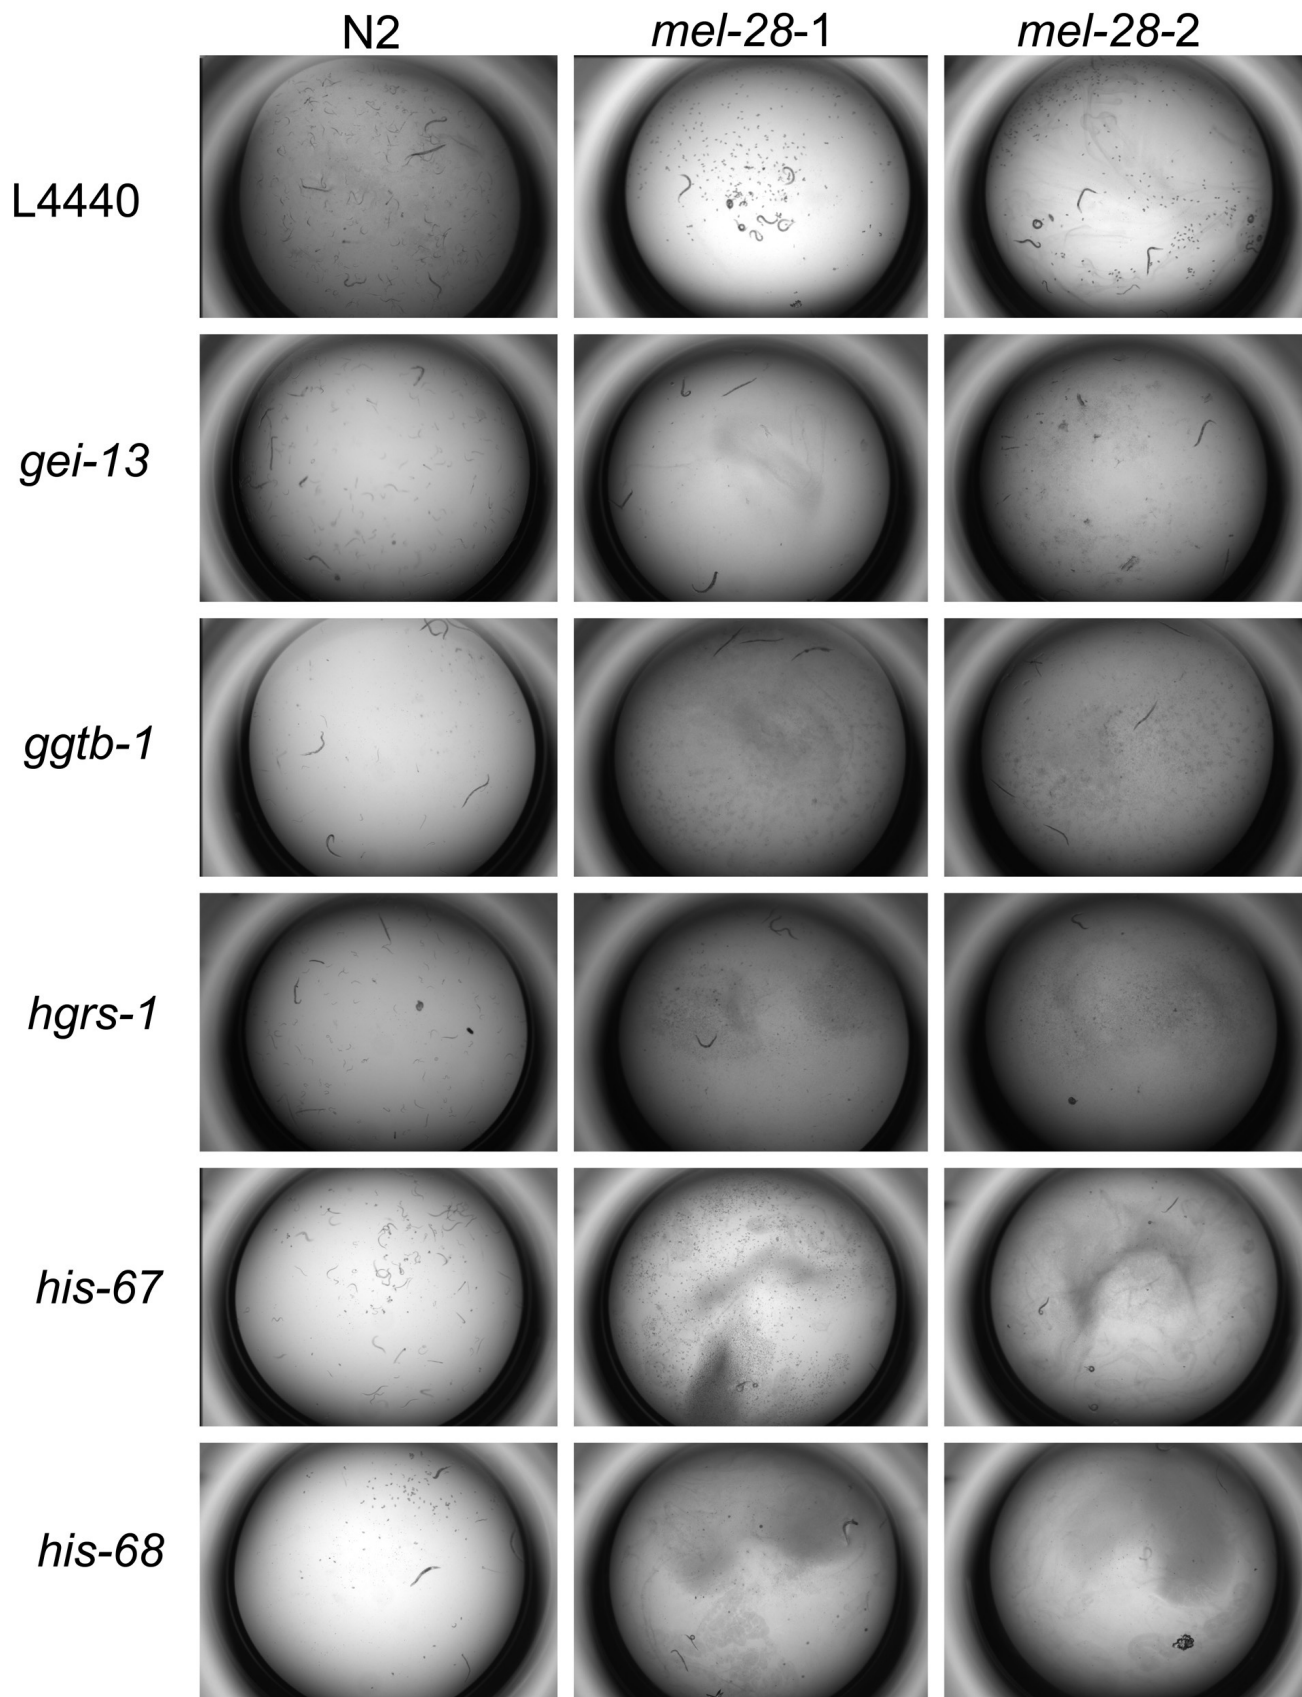

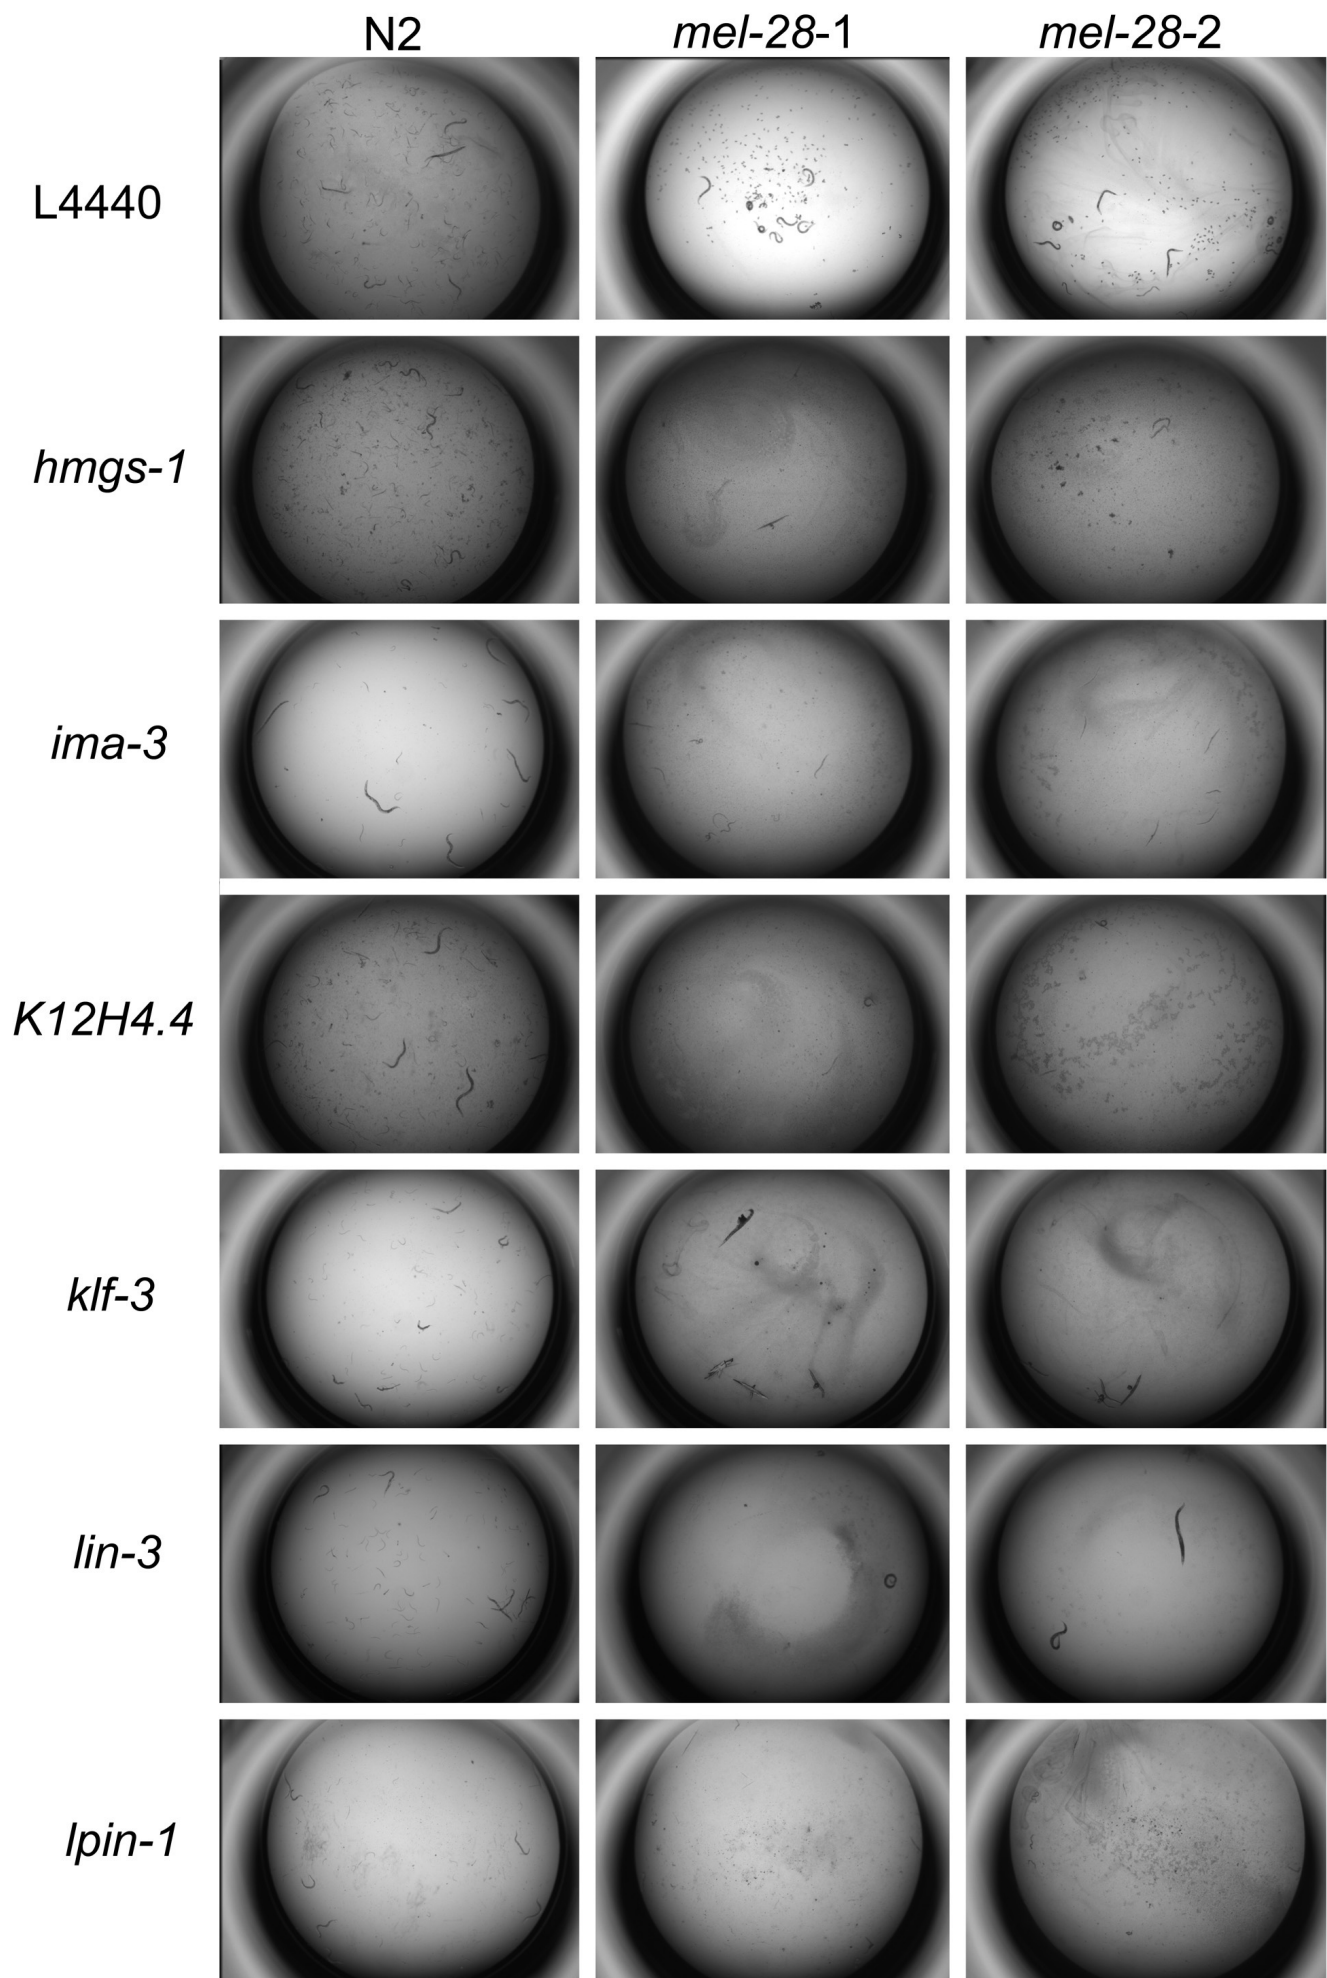

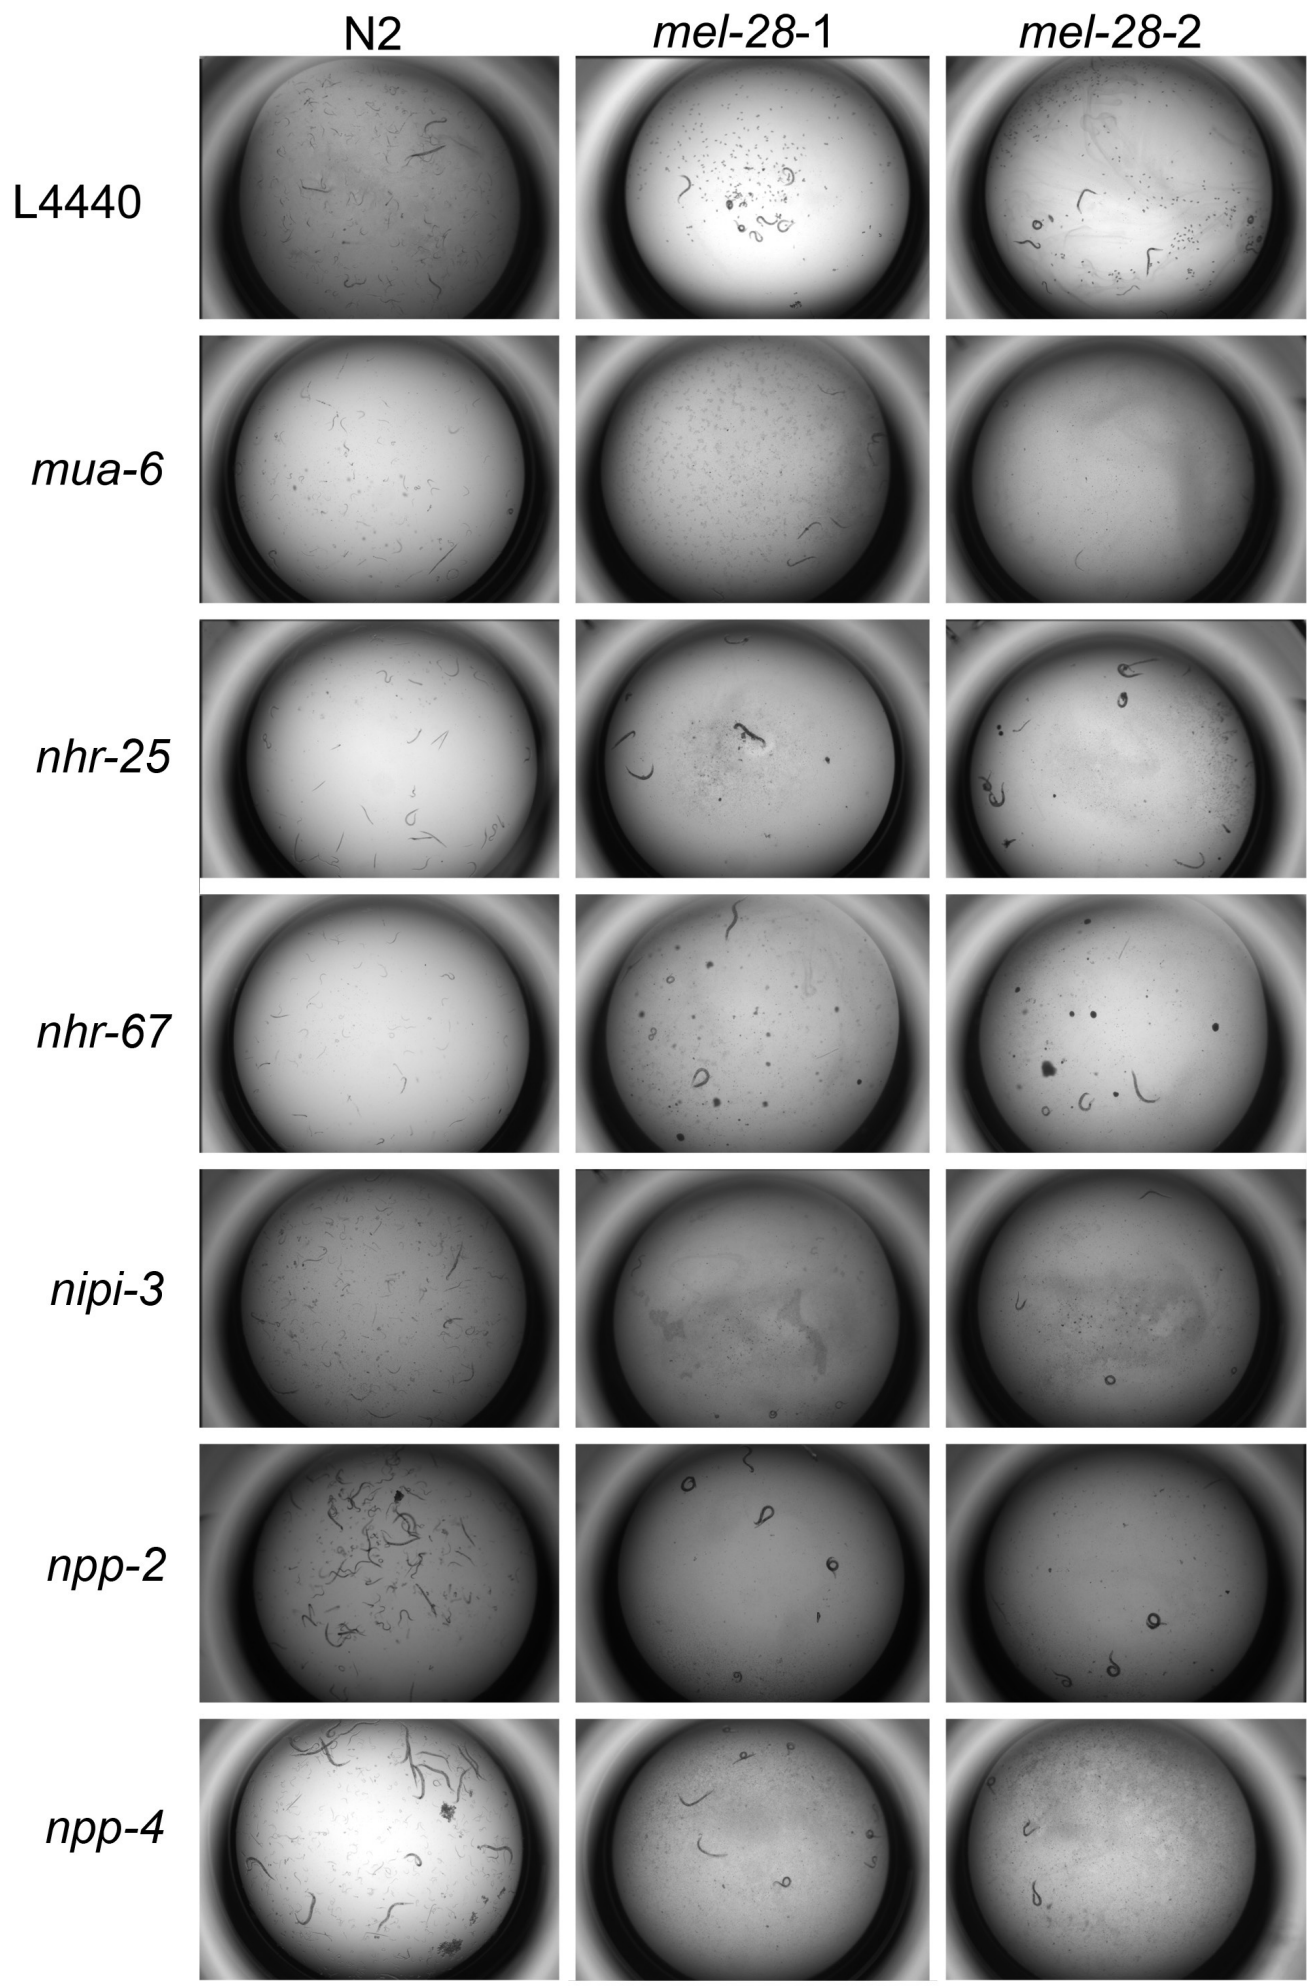



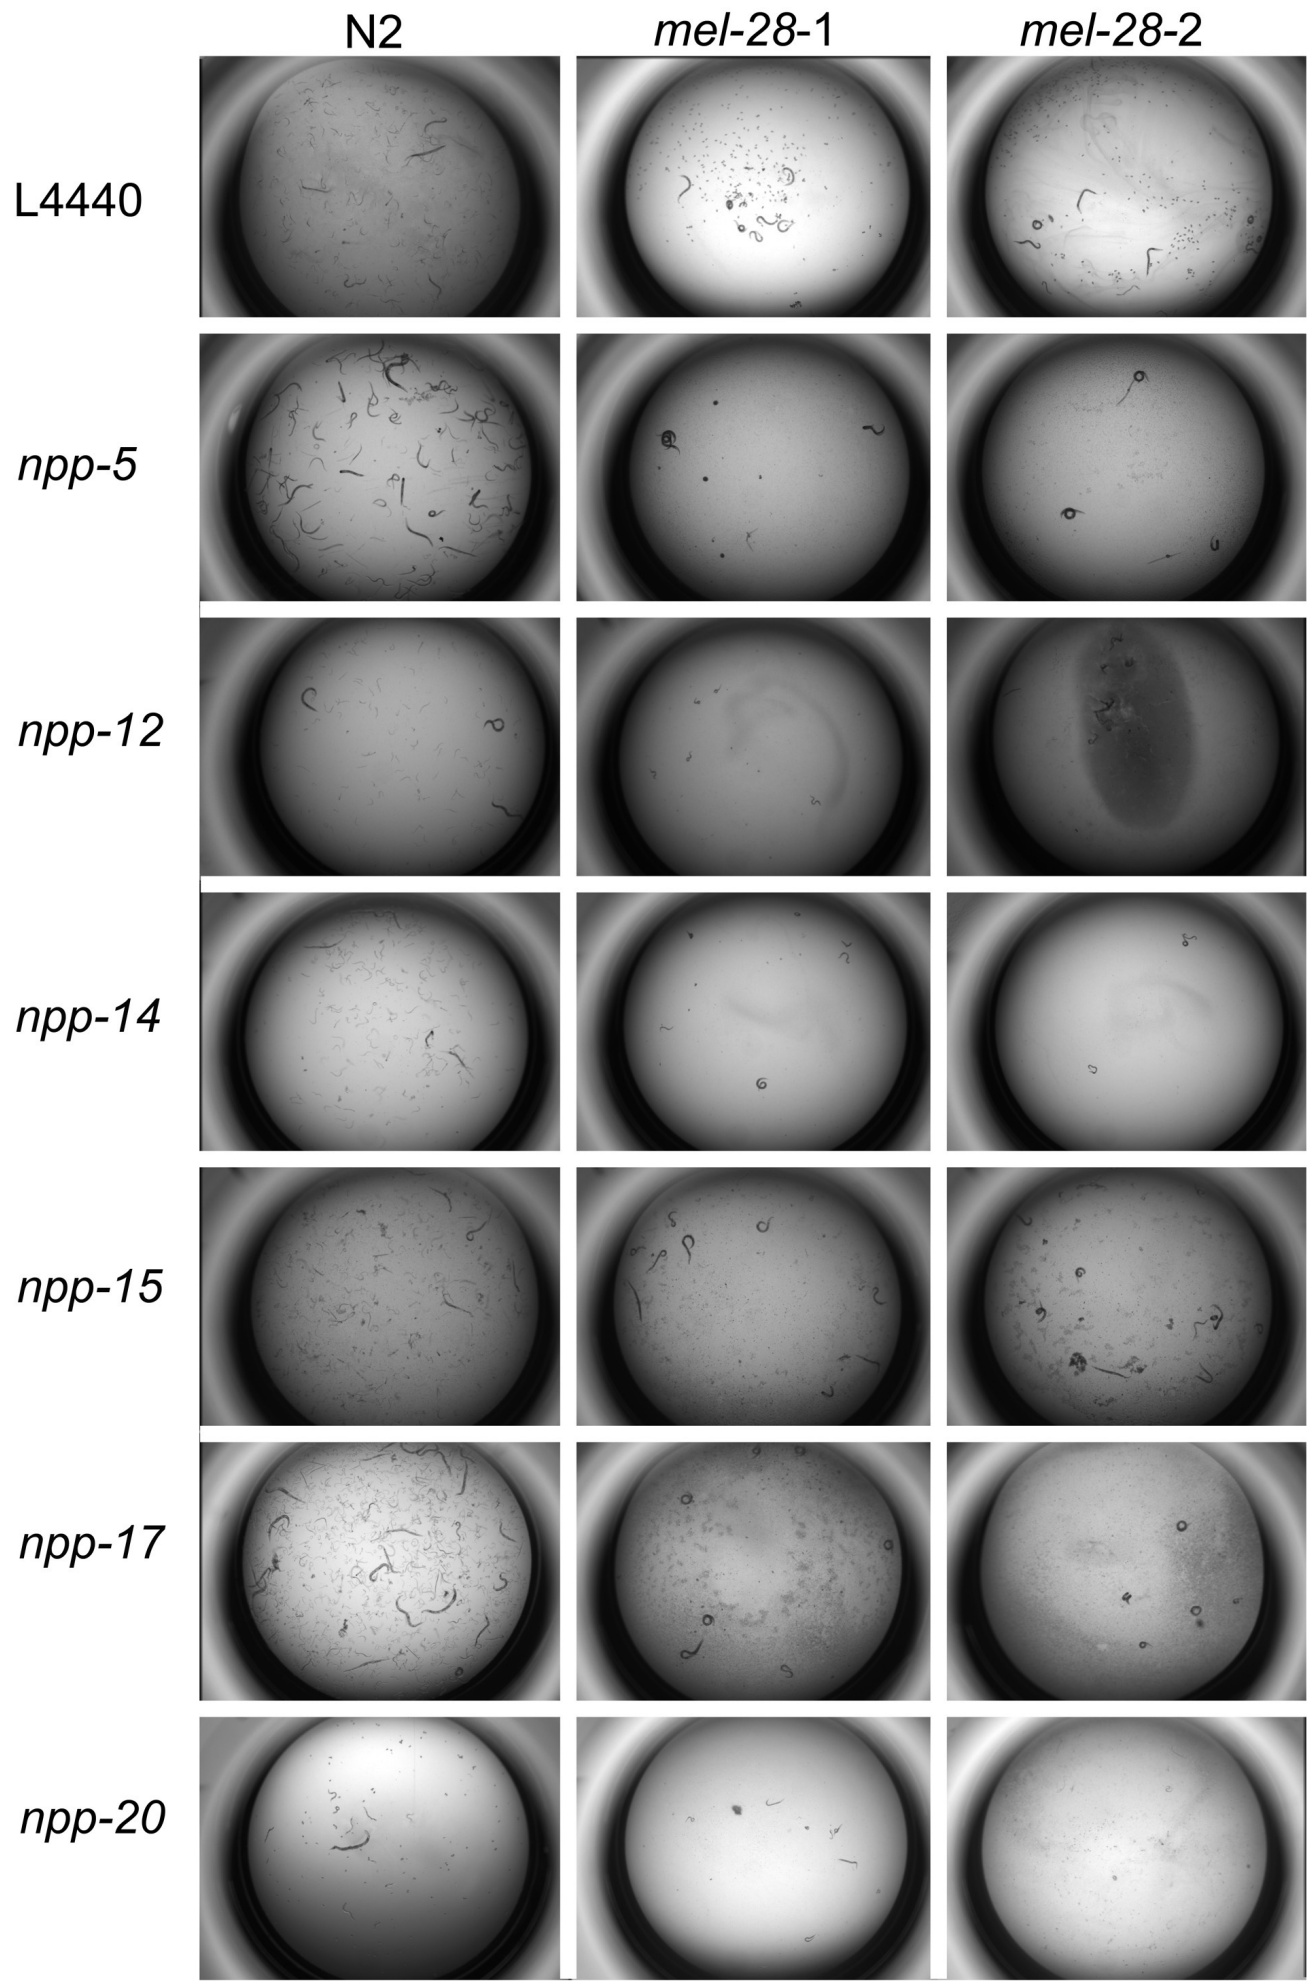

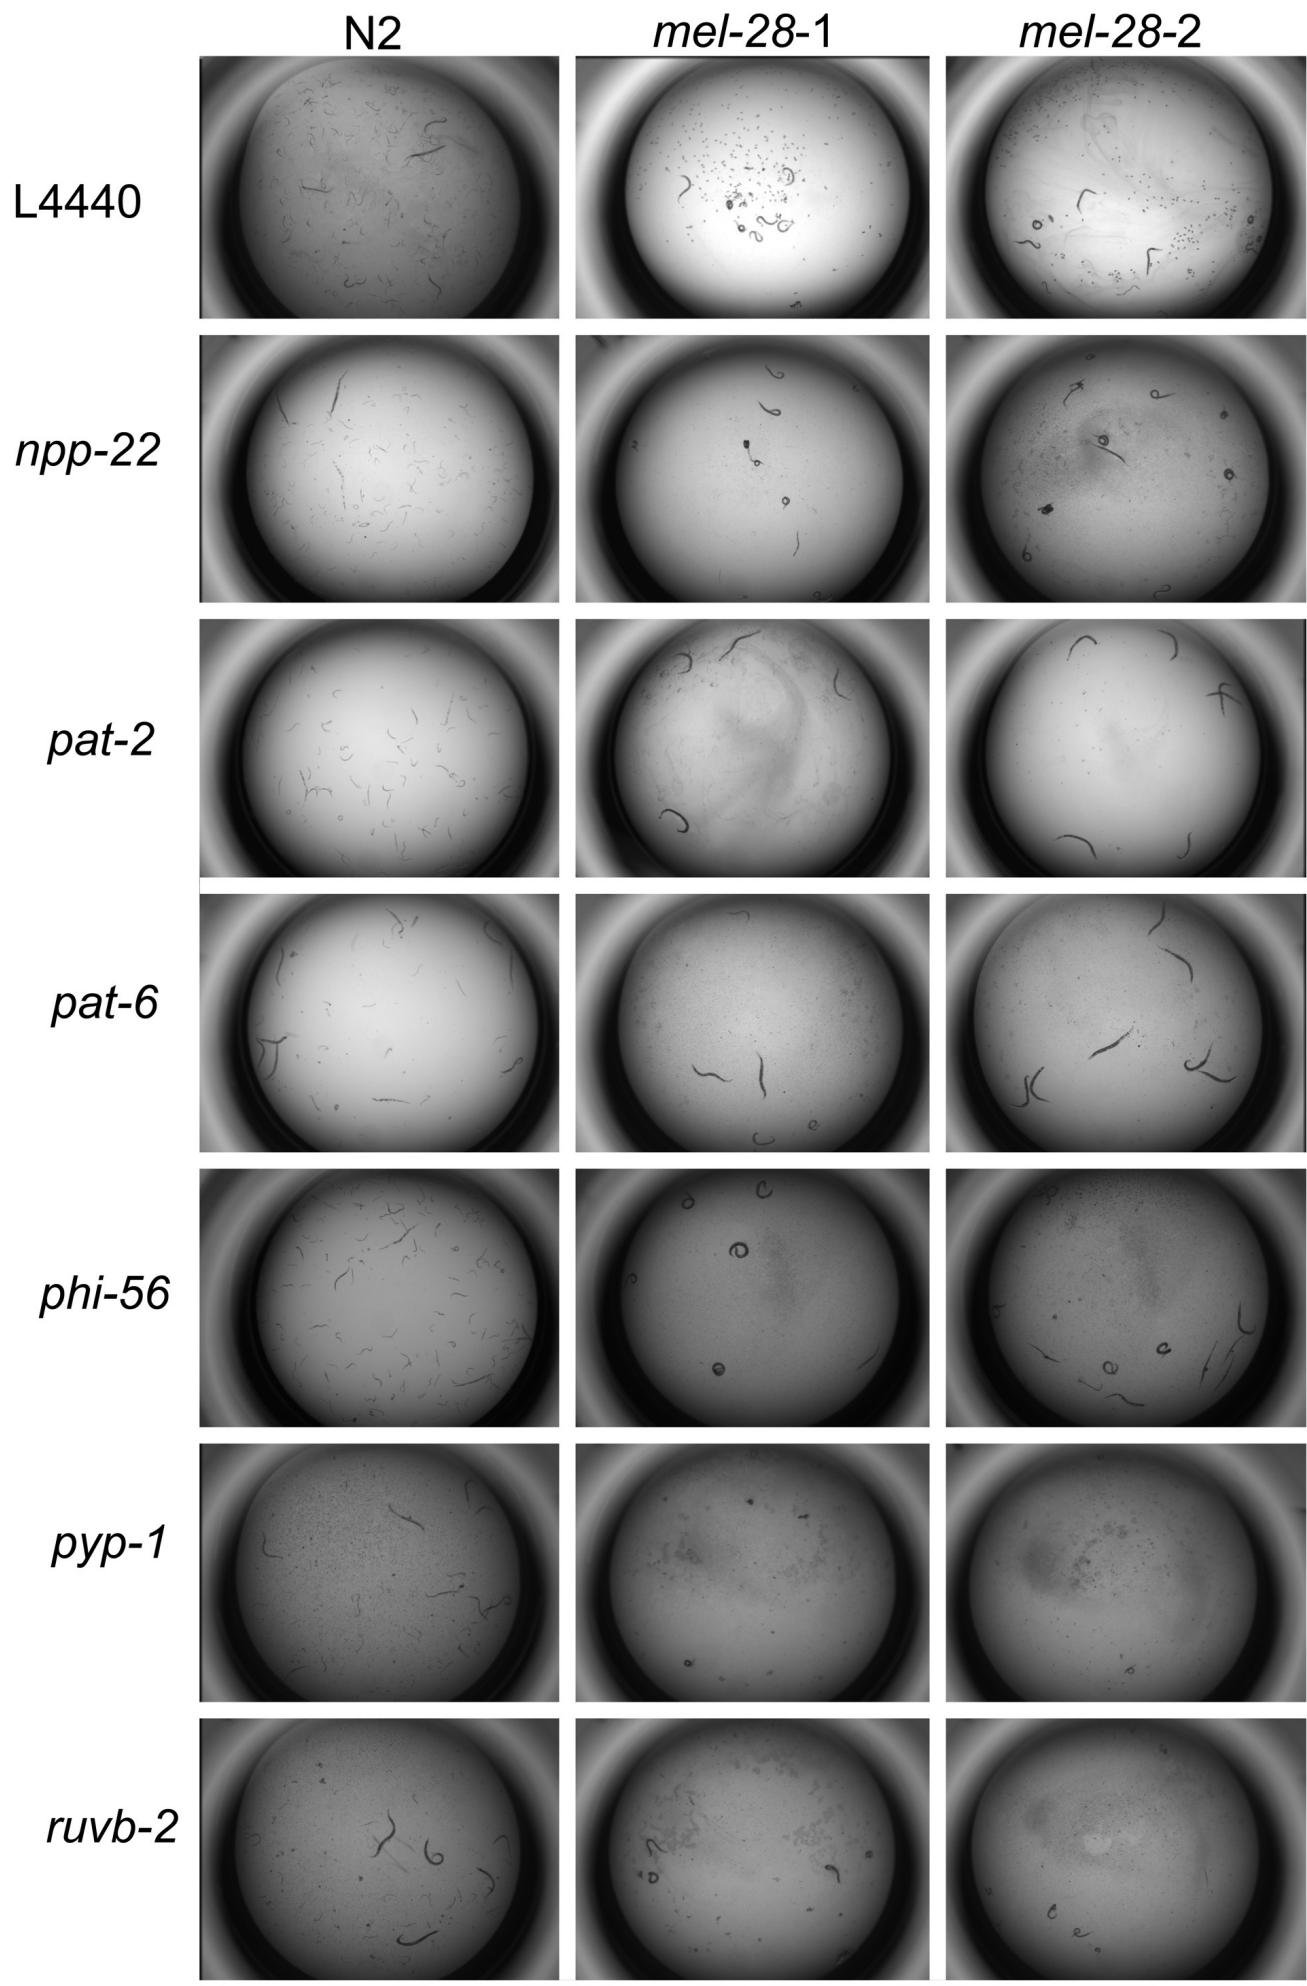

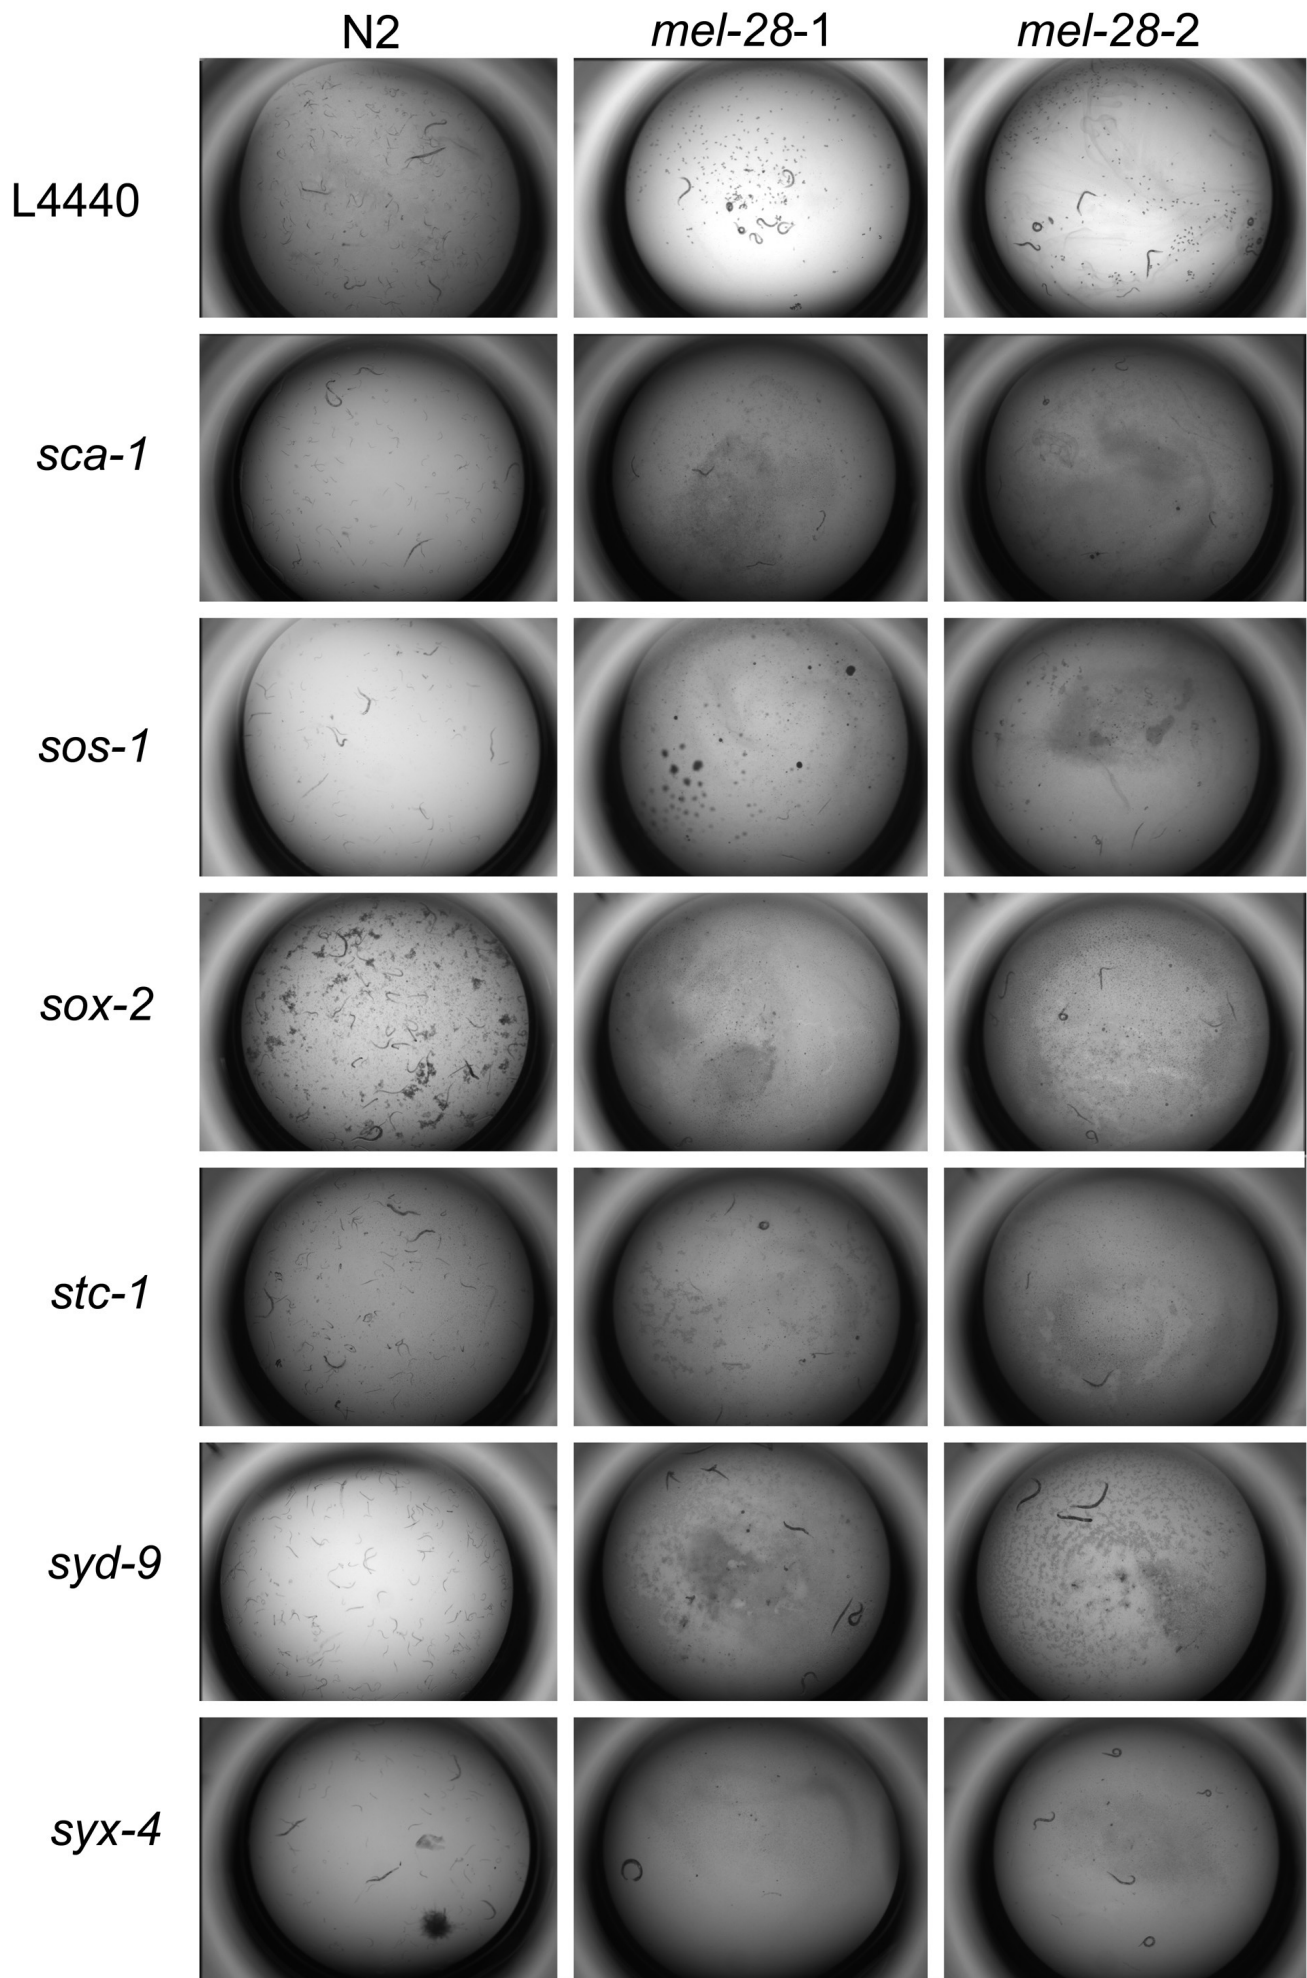

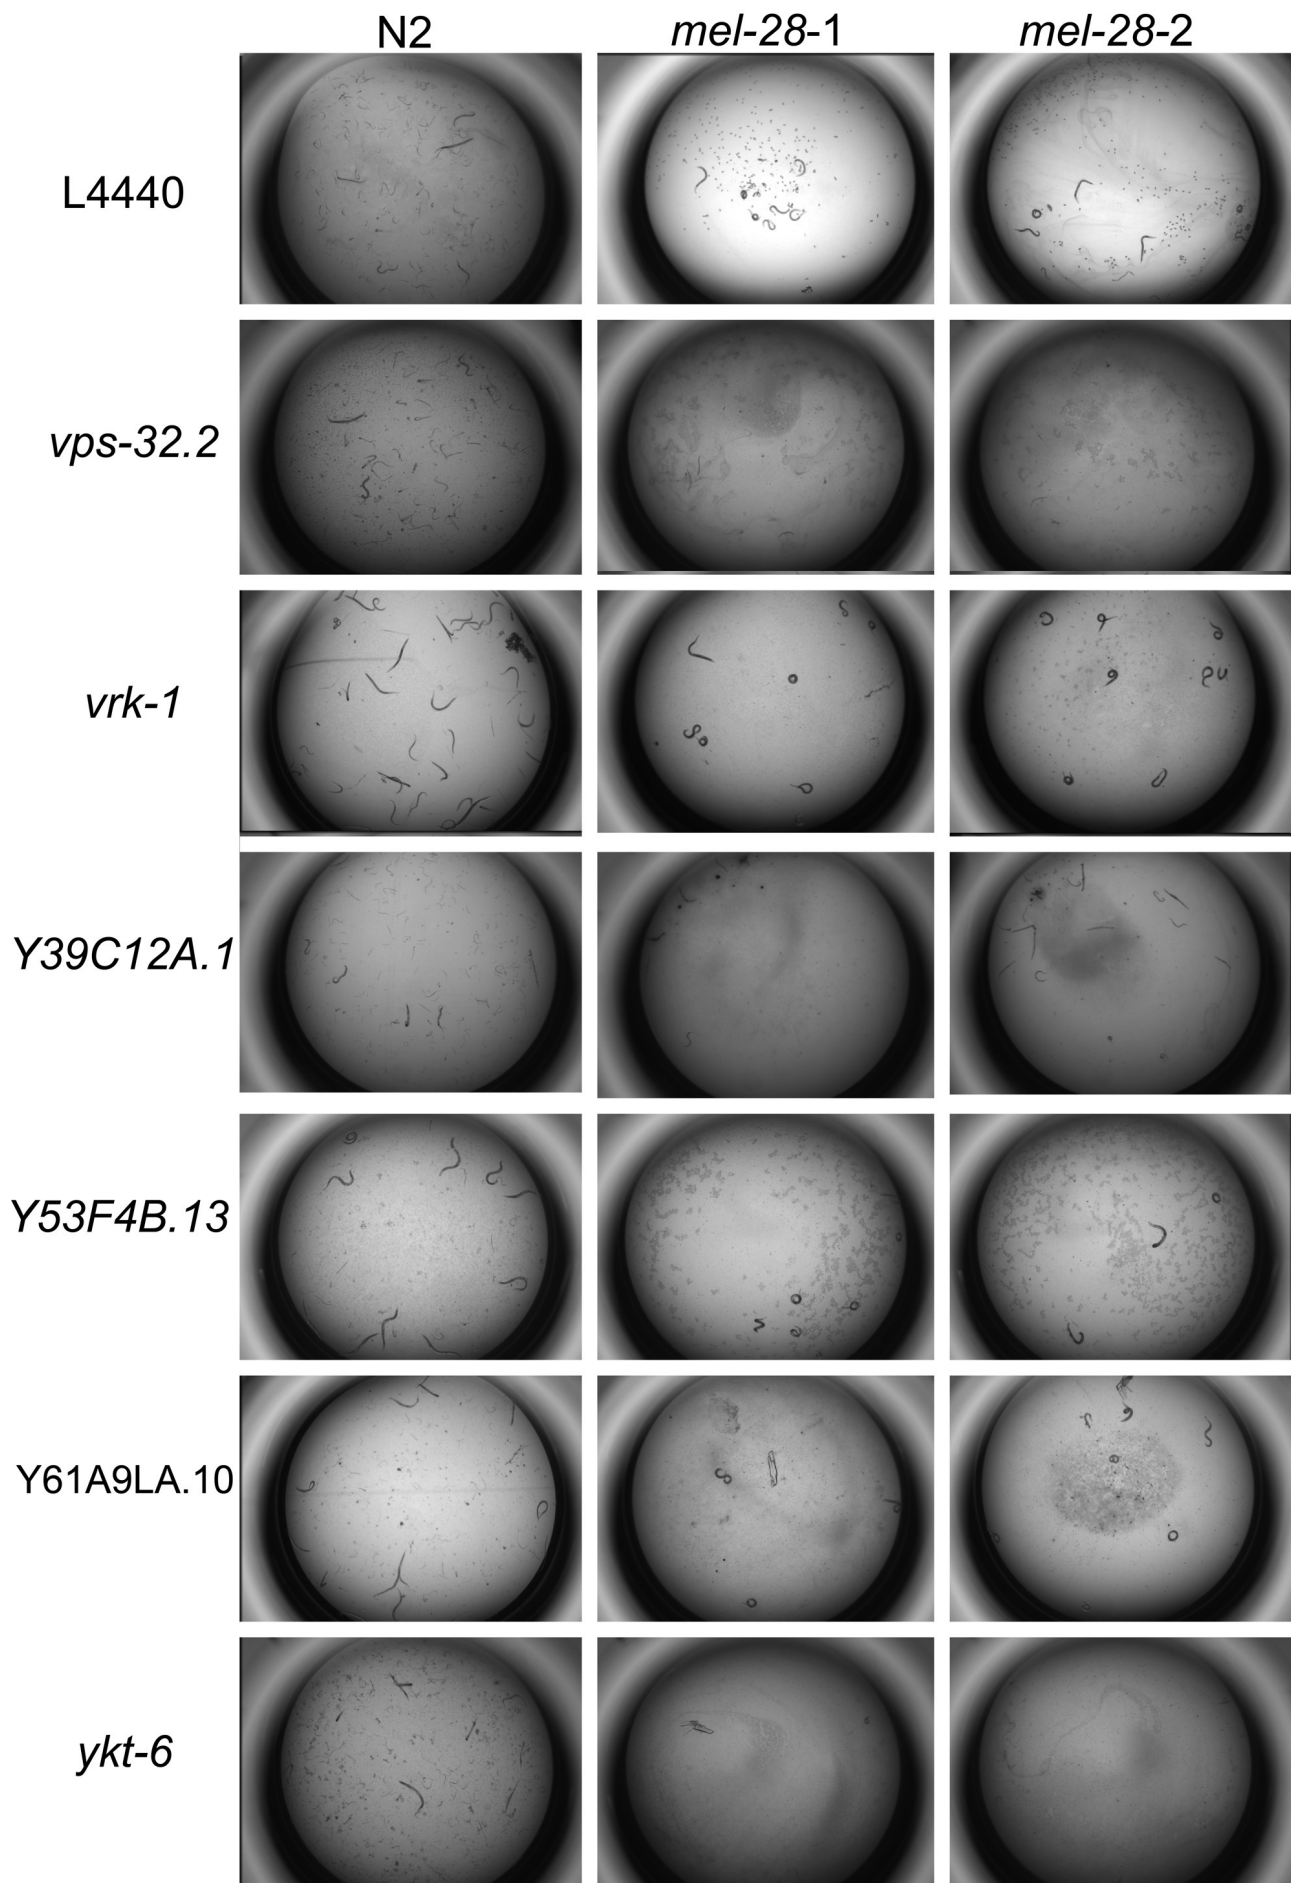

Figure S1 *mel-28* genetic interactor phenotypes

**Table S1 Brood size data for *mel-28* genetic interactors**

| gene           | progeny/a<br>dult (N2) | eggs/ adult<br>( <i>mel-28</i> ) | ratio N2 brood size: <i>mel-28</i><br>brood size | genetic interaction |
|----------------|------------------------|----------------------------------|--------------------------------------------------|---------------------|
| <i>pat-2</i>   | 25.3                   | 0.8                              | 31.6                                             | synthetic sterility |
| <i>pat-6</i>   | 7.3                    | 0.8                              | 9.1                                              | enhancement         |
| <i>klf-3</i>   | 13.9                   | 0.0                              | >3                                               | synthetic sterility |
| <i>his-67</i>  | 9.9                    | 2.7                              | 3.7                                              | enhancement         |
| <i>his-68</i>  | 10.2                   | 0.0                              | >3                                               | enhancement         |
| <i>pyp-1</i>   | 2.8                    | 0.0                              | >3                                               | enhancement         |
| <i>ruvb-2</i>  | 9.5                    | 0.7                              | 13.6                                             | enhancement         |
| <i>dhc-1</i>   | 1.7                    | 0.0                              | >3                                               | enhancement         |
| <i>dyci-1</i>  | 4                      | 0.0                              | >3                                               | enhancement         |
| <i>dli-1</i>   | 16                     | 0.4                              | 40                                               | synthetic sterility |
| <i>dnc-1</i>   | 14.1                   | 0.6                              | 23.5                                             | synthetic sterility |
| <i>cap-1</i>   | 12                     | 0.6                              | 20                                               | enhancement         |
| <i>cap-2</i>   | 8.4                    | 1.4                              | 6                                                | enhancement         |
| <i>arp-1</i>   | 16.7                   | 1.8                              | 9.3                                              | synthetic sterility |
| <i>npp-2</i>   | 8.7                    | 0.7                              | 12.4                                             | enhancement         |
| <i>npp-4</i>   | 14.7                   | 0.0                              | >3                                               | synthetic sterility |
| <i>npp-5</i>   | 18.2                   | 1.8                              | 10.1                                             | synthetic sterility |
| <i>npp-12</i>  | 21.3                   | 0.3                              | 71                                               | synthetic sterility |
| <i>npp-14</i>  | 16.2                   | 0.0                              | >3                                               | synthetic sterility |
| <i>npp-15</i>  | 16                     | 0.0                              | >3                                               | synthetic sterility |
| <i>npp-17</i>  | 12.3                   | 0.3                              | 41                                               | enhancement         |
| <i>npp-20</i>  | 8.5                    | 0.0                              | >3                                               | enhancement         |
| <i>npp-22</i>  | 25                     | 0.0                              | >3                                               | synthetic sterility |
| <i>ima-3</i>   | 6                      | 0.0                              | >3                                               | enhancement         |
| <i>vrk-1</i>   | 4                      | 1.1                              | 3.6                                              | enhancement         |
| <i>lpin-1</i>  | 5                      | 0.0                              | >3                                               | enhancement         |
| <i>cct-2</i>   | 17.3                   | 0.2                              | 86.5                                             | synthetic sterility |
| <i>stc-1</i>   | 13.6                   | 1.3                              | 10.5                                             | synthetic sterility |
| <i>sca-1</i>   | 13.2                   | 0.0                              | >3                                               | synthetic sterility |
| <i>phi-56</i>  | 12.3                   | 0.0                              | >3                                               | enhancement         |
| <i>K12H4.4</i> | 11.8                   | 0.0                              | >3                                               | enhancement         |
| <i>ggtb-1</i>  | 2.6                    | 0.0                              | >3                                               | enhancement         |
| <i>ykt-6</i>   | 11.7                   | 1.0                              | 11.7                                             | enhancement         |
| <i>syx-4</i>   | 24.3                   | 0.4                              | 60.8                                             | synthetic sterility |
| <i>mua-6</i>   | 18.5                   | 0.7                              | 26.4                                             | synthetic sterility |
| <i>syd-9</i>   | 55                     | 0.2                              | 275                                              | synthetic sterility |

|                 |      |     |      |                     |
|-----------------|------|-----|------|---------------------|
| <i>arf-3</i>    | 4.2  | 0.0 | >3   | enhancement         |
| <i>hgrs-1</i>   | 17.8 | 0.0 | >3   | synthetic sterility |
| <i>vps-32.2</i> | 11.3 | 0.0 | >3   | enhancement         |
| Y61A9LA.10      | 9.4  | 0.0 | >3   | enhancement         |
| <i>eif-1</i>    | 3.7  | 0.0 | >3   | enhancement         |
| Y39C12A.1       | 20.8 | 0.7 | 29.7 | synthetic sterility |
| F52C6.2         | 16   | 1.8 | 8.9  | synthetic sterility |
| F52C6.3         | 14.7 | 0.0 | >3   | synthetic sterility |
| <i>exos-3</i>   | 11.2 | 3.0 | 3.7  | enhancement         |
| <i>alg-1</i>    | 4.9  | 0.0 | >3   | enhancement         |
| <i>cyd-1</i>    | 27.8 | 0.0 | >3   | synthetic sterility |
| <i>ego-2</i>    | 15   | 0.6 | 25   | synthetic sterility |
| <i>dre-1</i>    | 9.3  | 0.0 | >3   | enhancement         |
| <i>nipi-3</i>   | 8.1  | 1.0 | 8.1  | enhancement         |
| <i>hmgs-1</i>   | 15.7 | 0.0 | >3   | synthetic sterility |
| <i>nhr-25</i>   | 17.1 | 0.0 | >3   | synthetic sterility |
| <i>nhr-67</i>   | 23.3 | 0.0 | >3   | synthetic sterility |
| <i>apl-1</i>    | 32   | 0.0 | >3   | synthetic sterility |
| F19B6.1         | 15.6 | 0.0 | >3   | synthetic sterility |
| C55A6.9         | 6.8  | 0.2 | 34   | enhancement         |
| <i>egl-13</i>   | 25   | 0.0 | >3   | synthetic sterility |
| <i>sox-2</i>    | 17   | 0.0 | >3   | synthetic sterility |
| <i>gei-13</i>   | 15   | 0.4 | 37.5 | synthetic sterility |
| Y53F4B.13       | 3.8  | 0.0 | >3   | enhancement         |
| <i>lin-3</i>    | 26.7 | 0.7 | 38.1 | synthetic sterility |
| <i>arx-2</i>    | 27.2 | 0.0 | >3   | synthetic sterility |
| <i>eat-6</i>    | 10.9 | 0.0 | >3   | enhancement         |
| B0250.7         | 3.8  | 1.0 | 3.8  | enhancement         |
| <i>sos-1</i>    | 7.8  | 0.0 | >3   | enhancement         |

For each strain (N2 or *mel-28*) the number of progeny per adult was tallied. We did this by adding up the total number of mothers and dividing this number by the total number of progeny from at least two RNAi experiments. For the *dhc-1* gene these tallies came from a single RNAi experiment (see methods for details).

**Table S2 GO-enriched terms amongst *mel-28* genetic interactors**

| N  | P value  | GO attribute ID | GO attribute name                                  |
|----|----------|-----------------|----------------------------------------------------|
| 2  | 2.04E-05 | GO:0008290      | F-actin capping protein complex                    |
| 2  | 6.11E-05 | GO:0005787      | signal peptidase complex                           |
| 3  | 1.06E-05 | GO:0005869      | dynactin complex                                   |
| 7  | 2.39E-11 | GO:0005643      | nuclear pore                                       |
| 3  | 1.92E-05 | GO:0051028      | mRNA transport                                     |
| 7  | 6.97E-11 | GO:0046930      | pore complex                                       |
| 10 | 5.02E-13 | GO:0005635      | nuclear envelope                                   |
| 5  | 3.34E-06 | GO:0006997      | nucleus organization                               |
| 5  | 2.25E-05 | GO:0007338      | single fertilization                               |
| 5  | 2.73E-05 | GO:0009566      | fertilization                                      |
| 10 | 2.10E-08 | GO:0031967      | organelle envelope                                 |
| 10 | 2.20E-08 | GO:0031975      | envelope                                           |
| 12 | 2.05E-09 | GO:0012505      | endomembrane system                                |
| 7  | 1.07E-05 | GO:0051656      | establishment of organelle localization            |
| 7  | 1.30E-05 | GO:0051640      | organelle localization                             |
| 7  | 2.82E-05 | GO:0032940      | secretion by cell                                  |
| 7  | 3.11E-05 | GO:0046903      | secretion                                          |
| 8  | 2.83E-05 | GO:0015031      | protein transport                                  |
| 11 | 1.16E-06 | GO:0044428      | nuclear part                                       |
| 8  | 3.15E-05 | GO:0045184      | establishment of protein localization              |
| 14 | 6.34E-08 | GO:0051649      | establishment of localization in cell              |
| 14 | 1.62E-07 | GO:0051641      | cellular localization                              |
| 21 | 7.91E-10 | GO:0043234      | protein complex                                    |
| 20 | 2.37E-09 | GO:0006898      | receptor-mediated endocytosis                      |
| 11 | 8.38E-06 | GO:0008104      | protein localization                               |
| 40 | 9.36E-12 | GO:0040007      | growth                                             |
| 20 | 2.91E-08 | GO:0006897      | endocytosis                                        |
| 21 | 3.49E-08 | GO:0016192      | vesicle-mediated transport                         |
| 42 | 7.57E-11 | GO:0009792      | embryo development ending in birth or egg hatching |
| 23 | 1.75E-08 | GO:0044422      | organelle part                                     |
| 21 | 6.33E-08 | GO:0044446      | intracellular organelle part                       |
| 21 | 6.69E-08 | GO:0032991      | macromolecular complex                             |
| 42 | 1.80E-10 | GO:0009790      | embryo development                                 |
| 33 | 6.12E-09 | GO:0002119      | nematode larval development                        |
| 33 | 6.24E-09 | GO:0002164      | larval development                                 |
| 33 | 7.71E-09 | GO:0009791      | post-embryonic development                         |

|    |          |            |                                           |
|----|----------|------------|-------------------------------------------|
| 31 | 1.40E-08 | GO:0051234 | establishment of localization             |
| 30 | 2.70E-08 | GO:0006810 | transport                                 |
| 44 | 3.85E-08 | GO:0048856 | anatomical structure development          |
| 46 | 7.61E-08 | GO:0007275 | multicellular organismal development      |
| 45 | 1.52E-07 | GO:0044767 | single-organism developmental process     |
| 24 | 2.20E-06 | GO:0040010 | positive regulation of growth rate        |
| 24 | 2.26E-06 | GO:0040009 | regulation of growth rate                 |
| 34 | 2.33E-07 | GO:0051179 | localization                              |
| 26 | 1.56E-06 | GO:0040011 | locomotion                                |
| 46 | 5.04E-07 | GO:0032502 | developmental process                     |
| 46 | 1.46E-06 | GO:0044707 | single-multicellular organism process     |
| 25 | 6.07E-06 | GO:0045927 | positive regulation of growth             |
| 46 | 3.83E-06 | GO:0032501 | multicellular organismal process          |
| 19 | 7.29E-05 | GO:0005515 | protein binding                           |
| 25 | 1.35E-05 | GO:0040008 | regulation of growth                      |
| 27 | 1.21E-05 | GO:0048518 | positive regulation of biological process |
| 33 | 5.12E-06 | GO:0000003 | reproduction                              |
| 30 | 5.50E-05 | GO:0043229 | intracellular organelle                   |
| 30 | 5.63E-05 | GO:0043226 | organelle                                 |

---

We used FuncAssociate ([http://llama.mshri.on.ca/funcassociate\\_client/html/](http://llama.mshri.on.ca/funcassociate_client/html/)) to determine the GO term enrichment within the list of 65 *mel-28* genetic interactors identified. The background set was the entire *C. elegans* genome.
