# Supplementary material for: Uncovering Buffered Pleiotropy: A Genome-Scale Screen formel-28Genetic Interactors inCaenorhabditis elegans
Source: Oxford University Press journal article supplement (doi:10.1534/g3.113.008532), 2013-12-04
Supplement: 008532_figures1.pdf [file 008532_figures1.pdf]

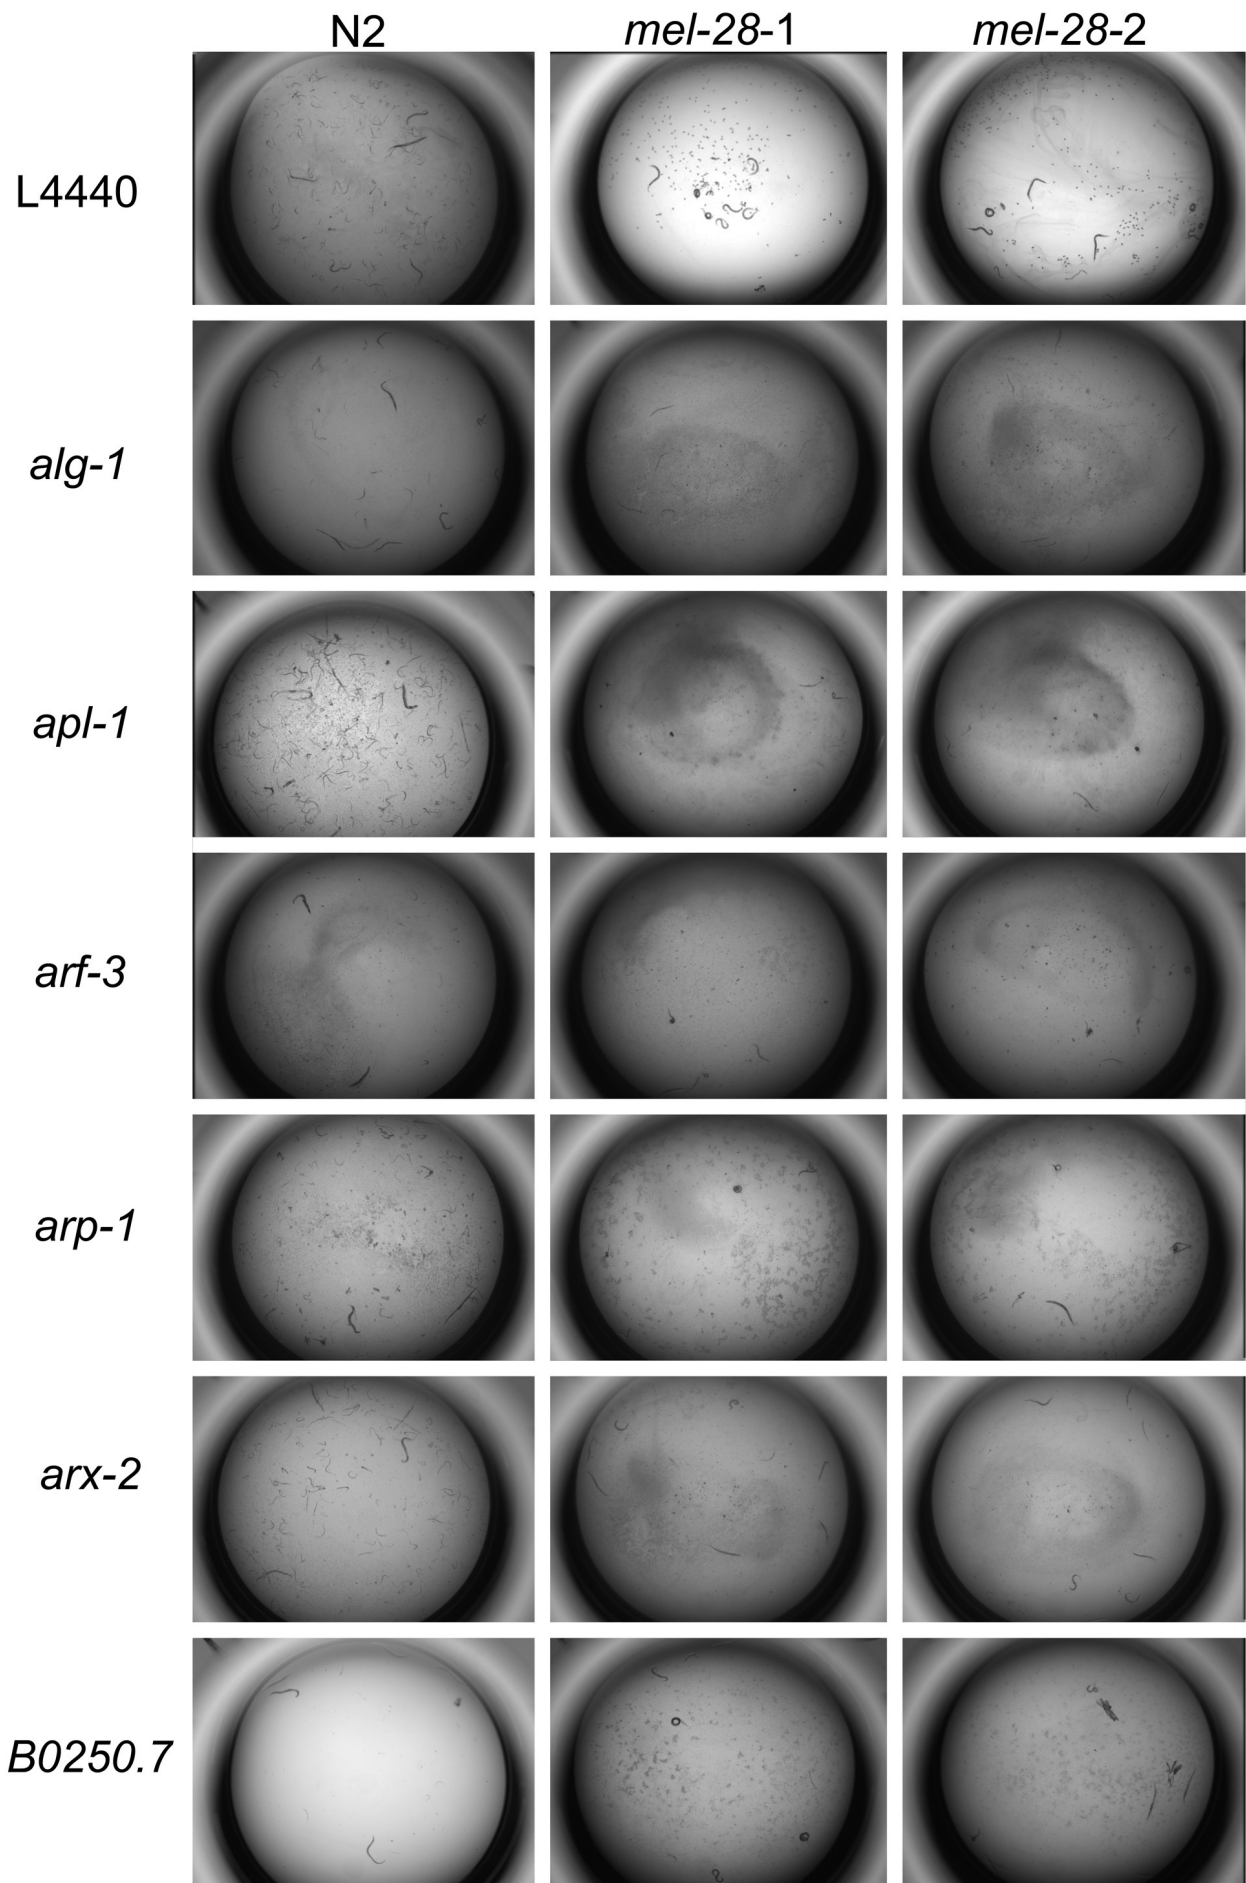

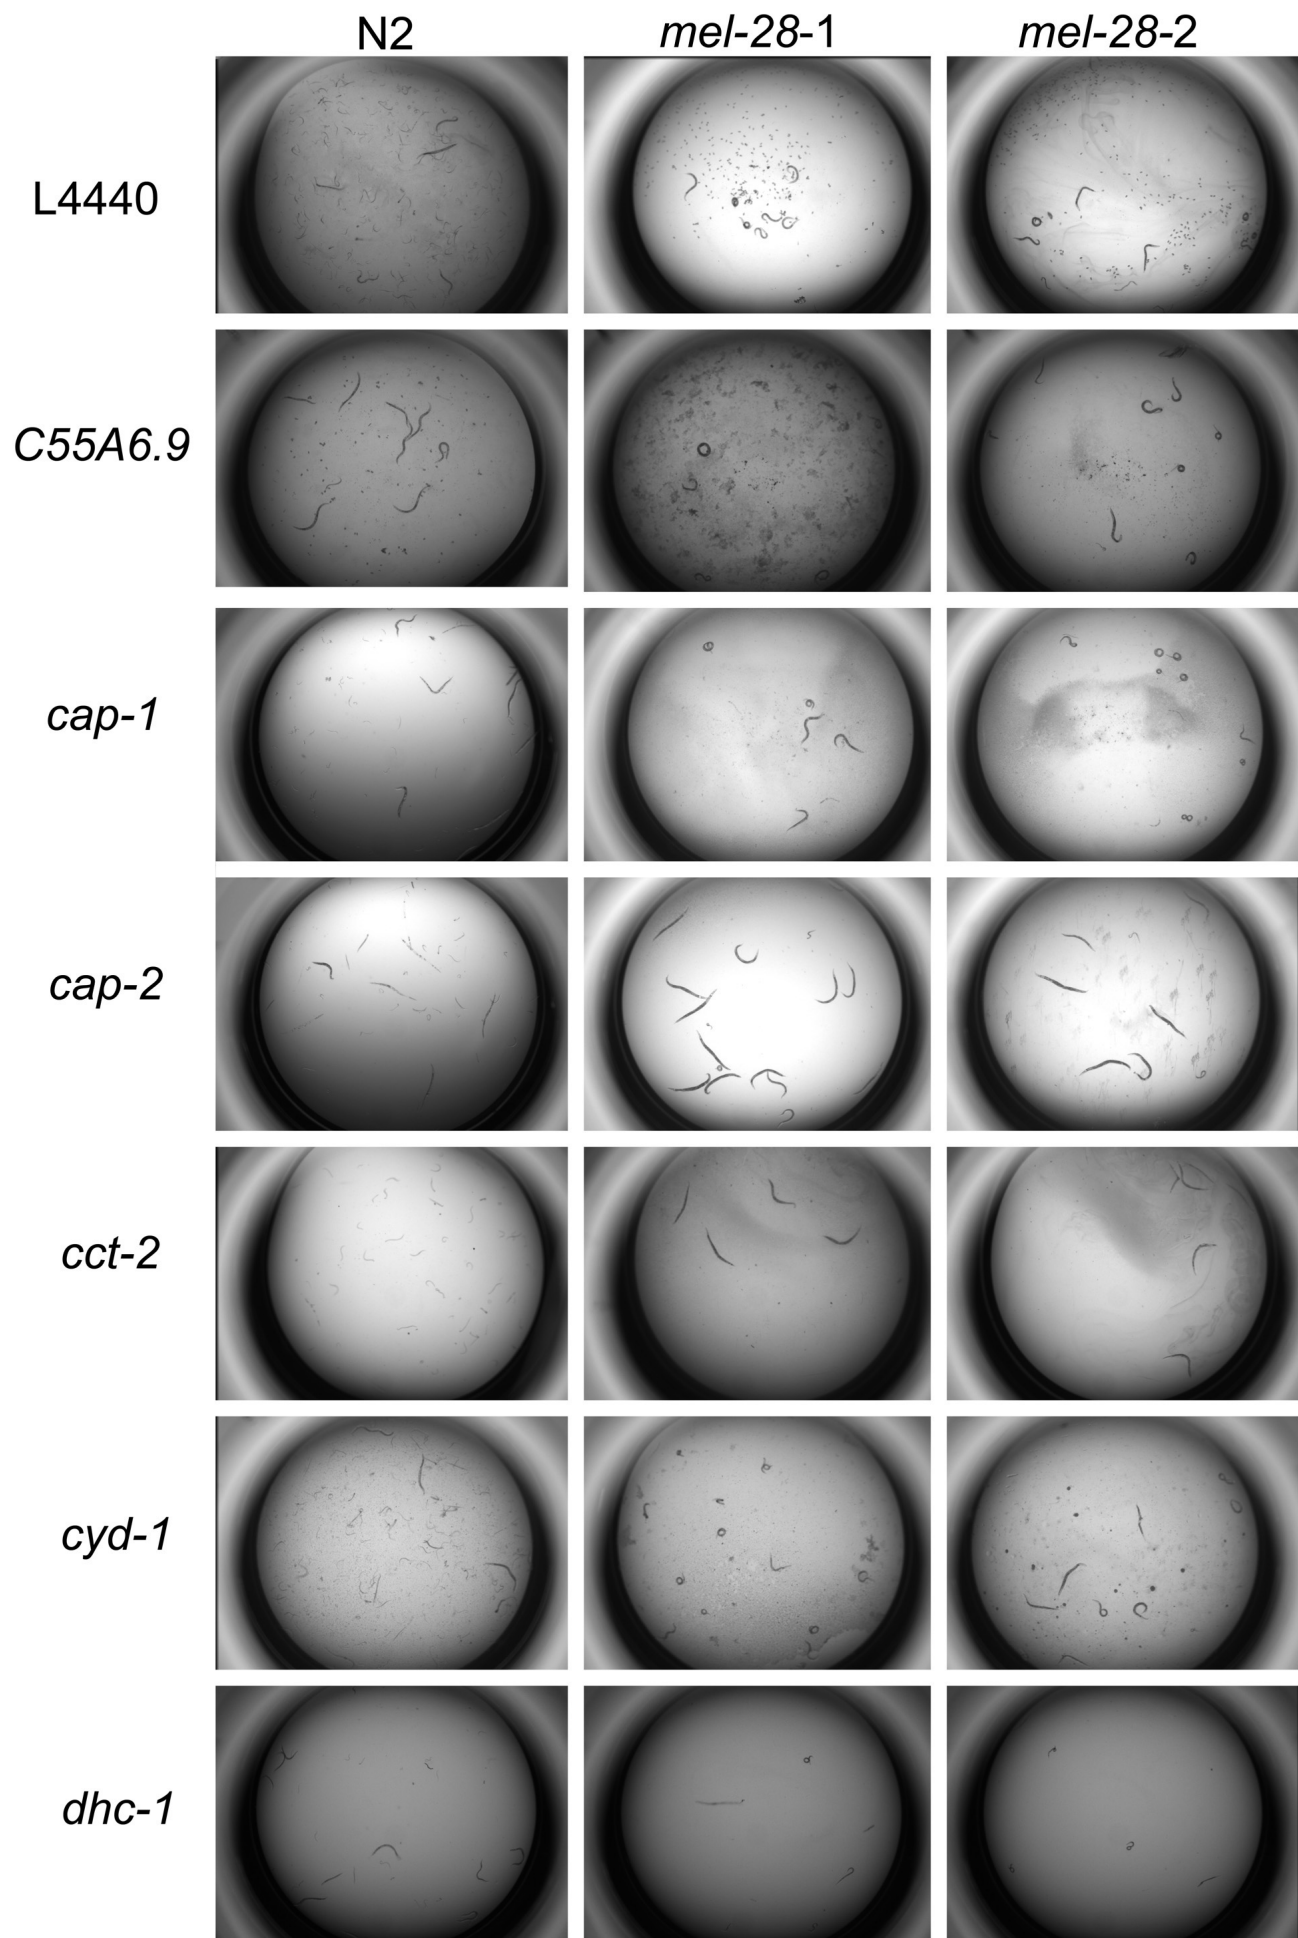

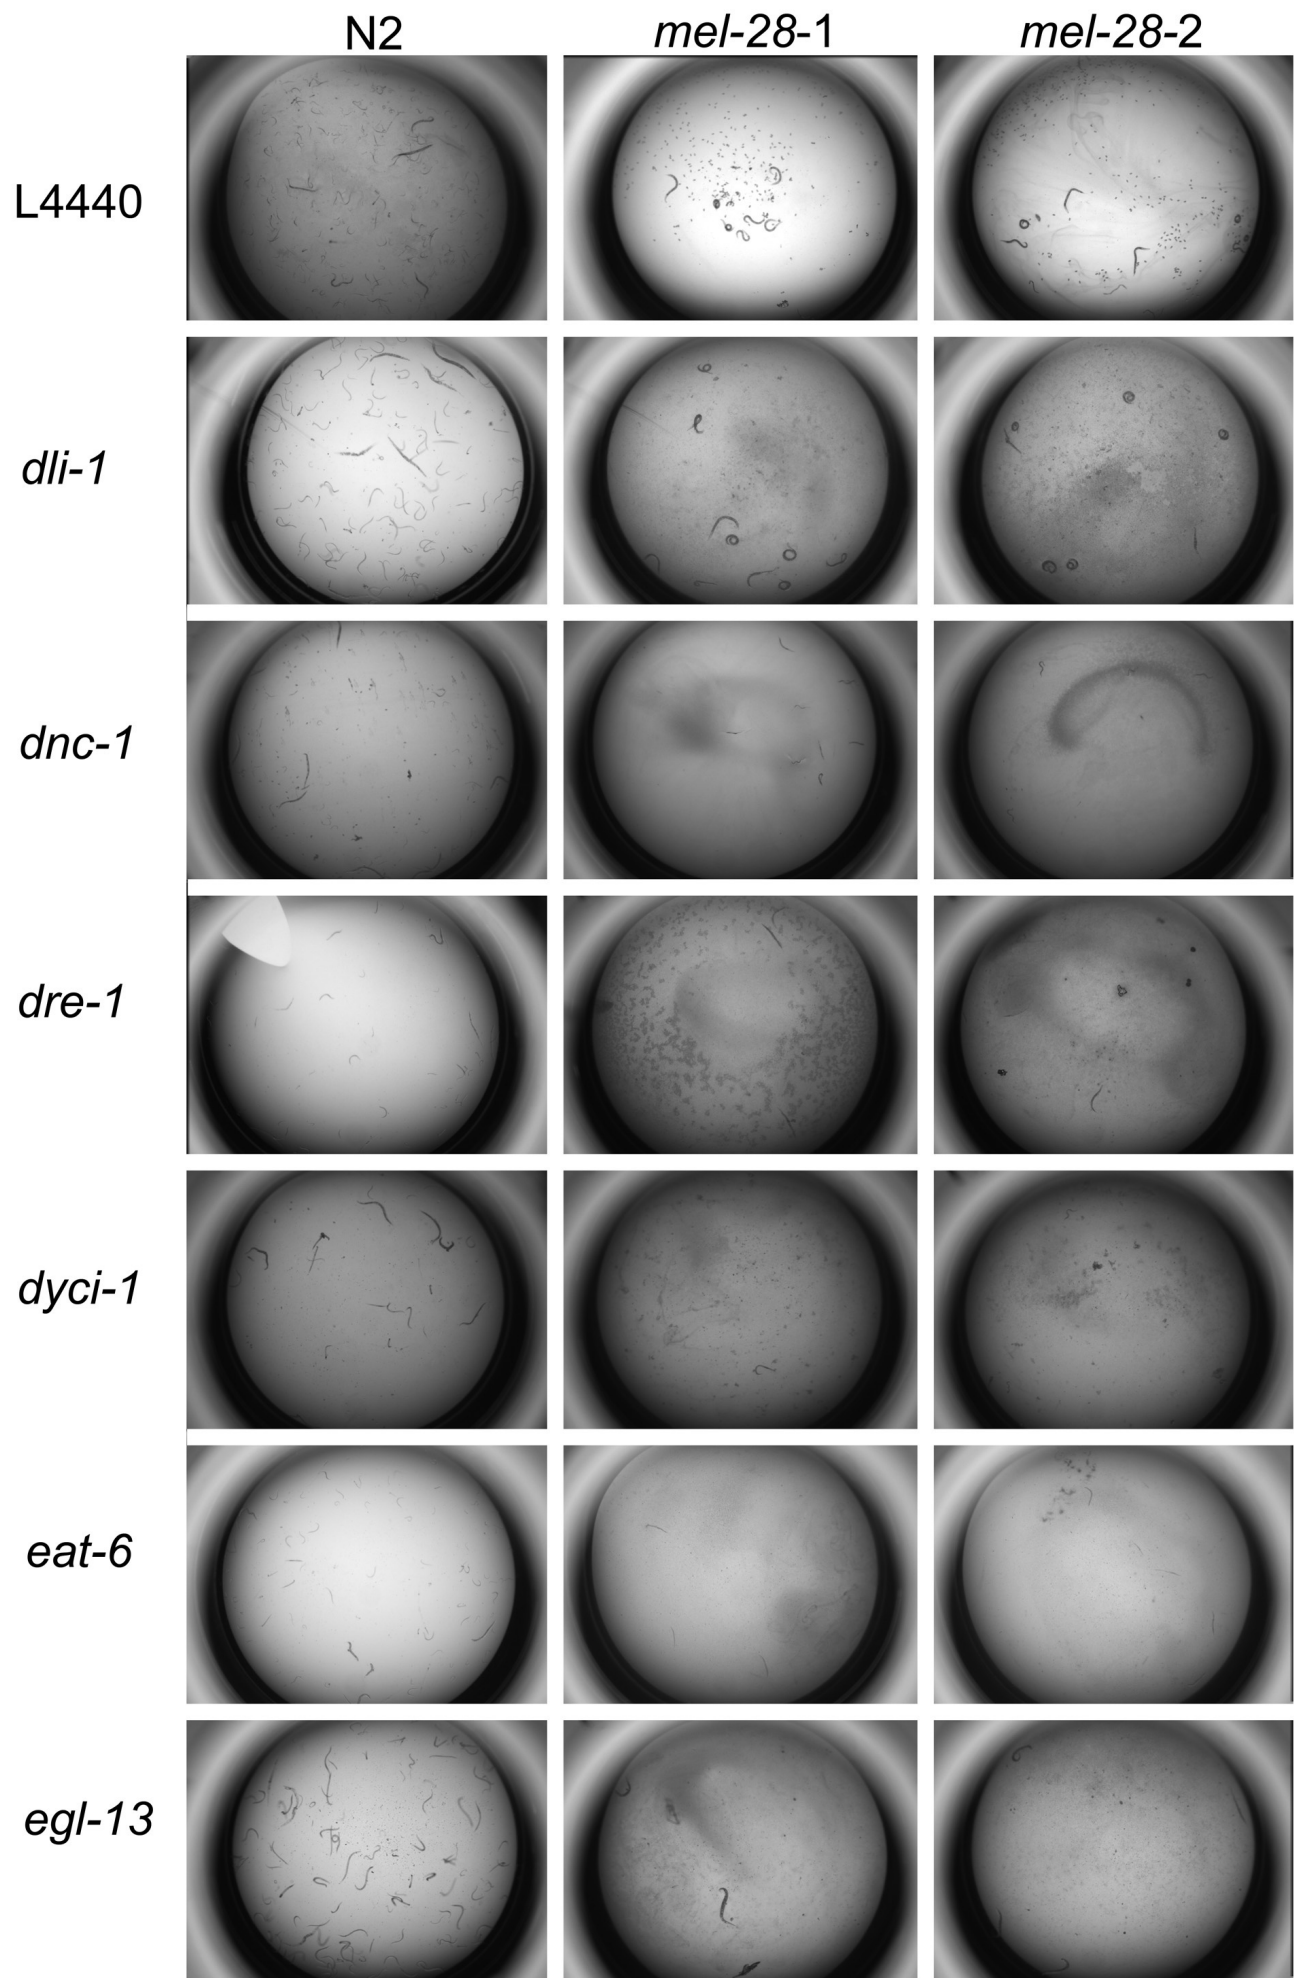

N2

*mel-28-1*

*mel-28-2*

L4440

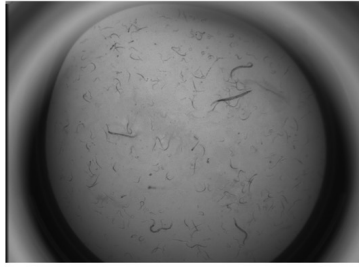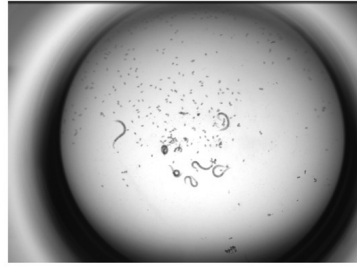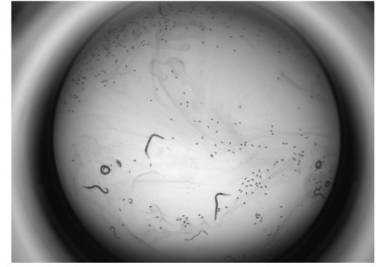

*ego-2*

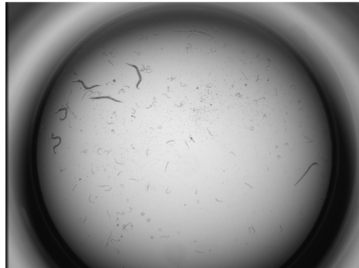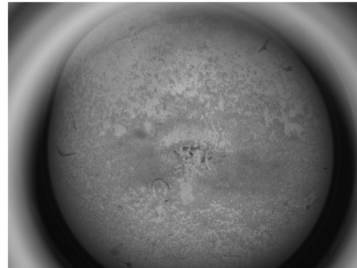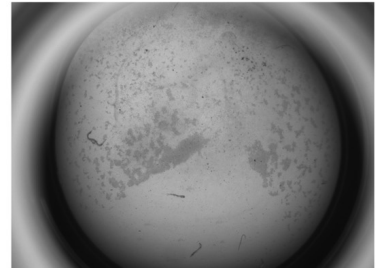

*eif-1*

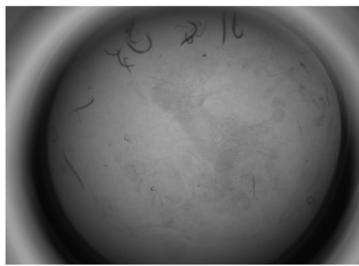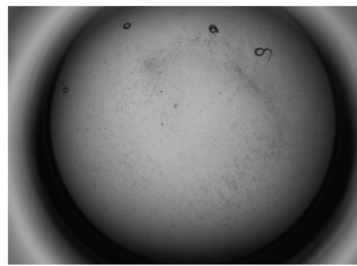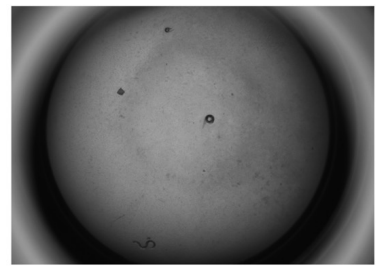

*exos-3*

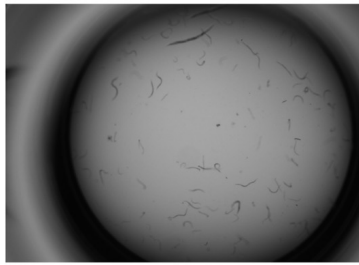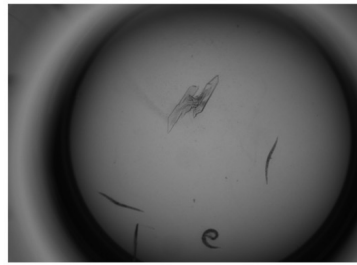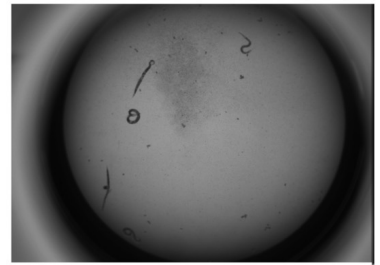

F19B6.1

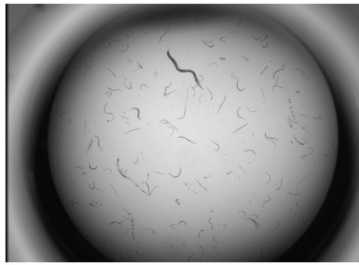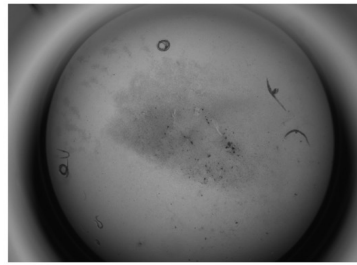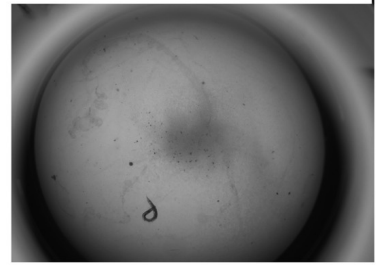

F52C6.2

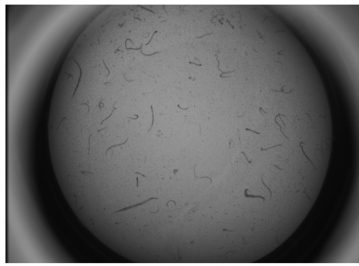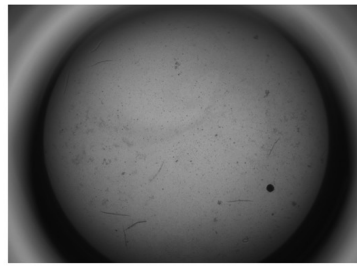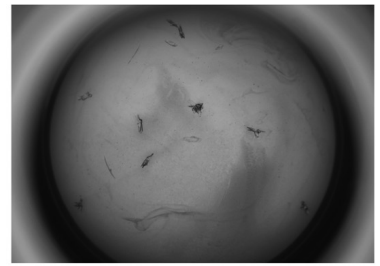

F52C6.3

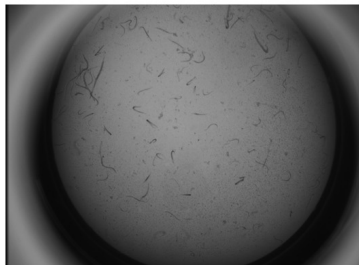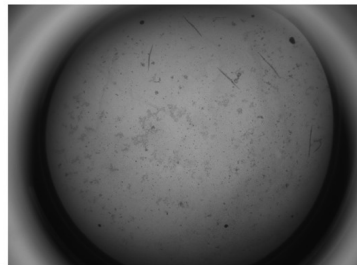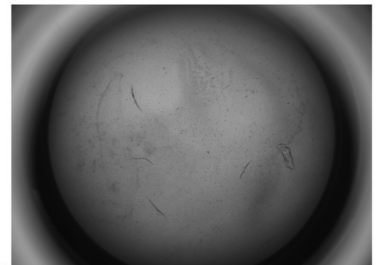



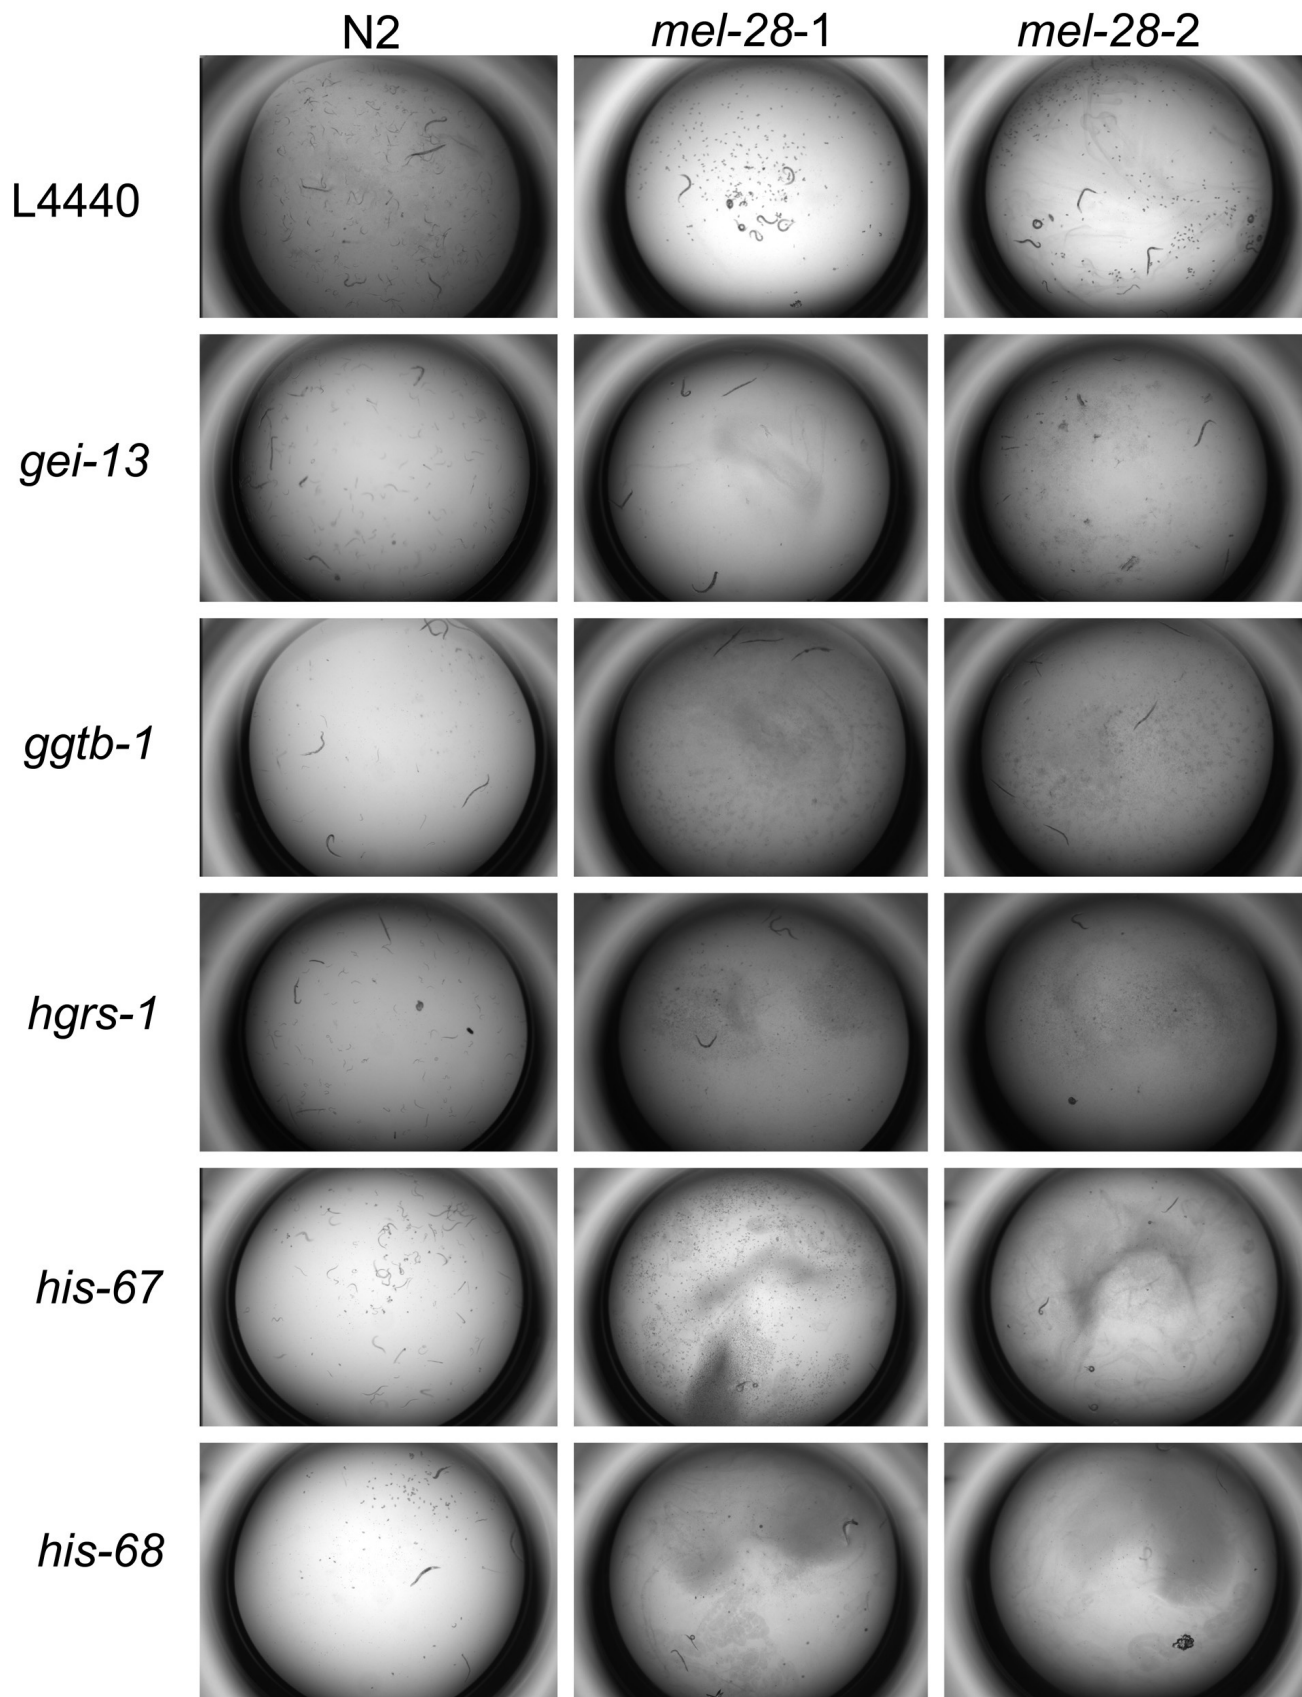

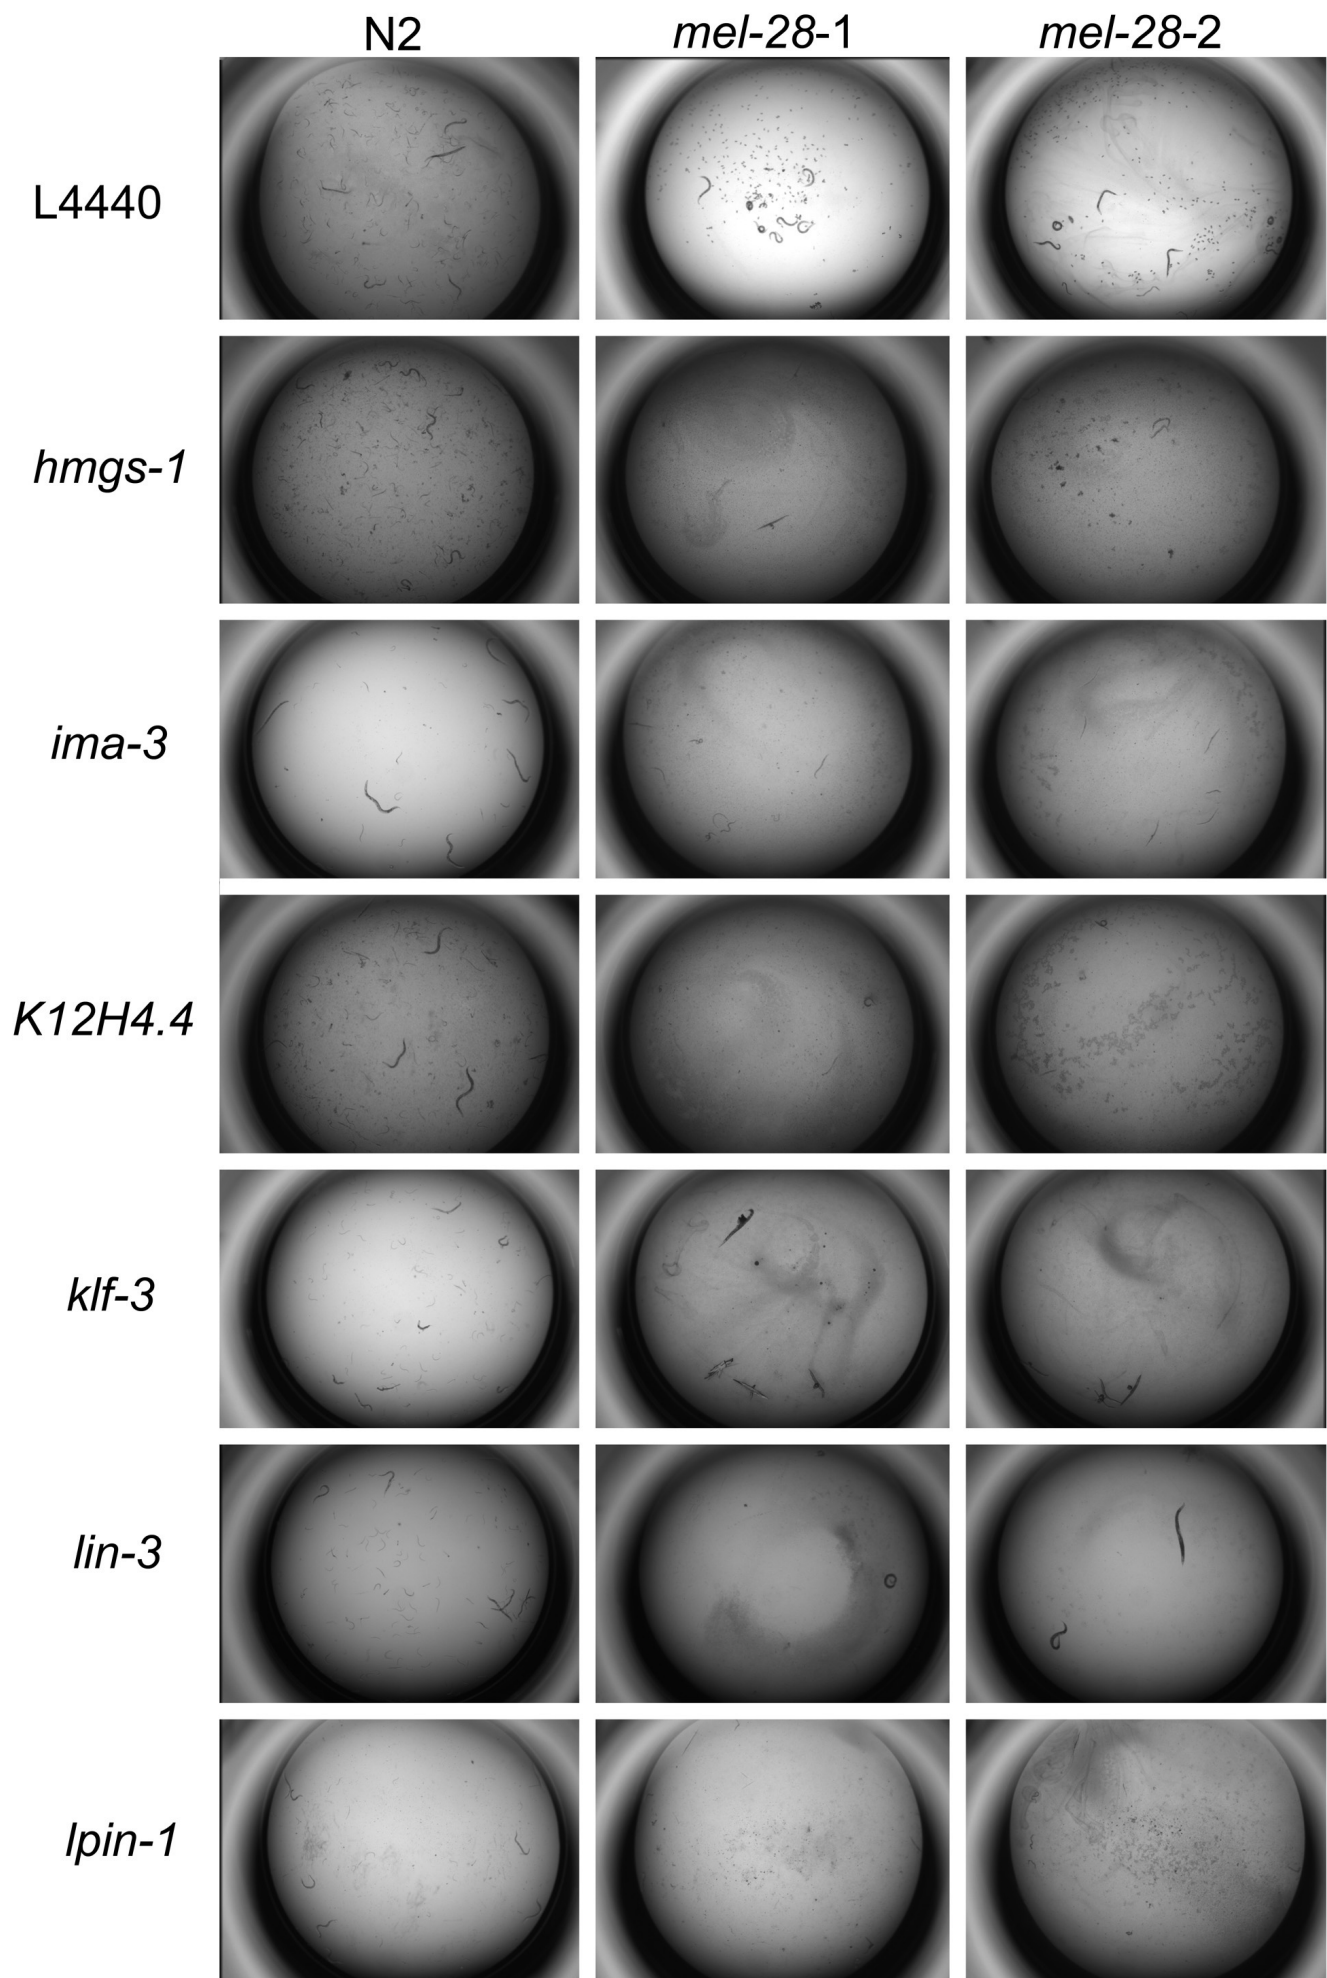

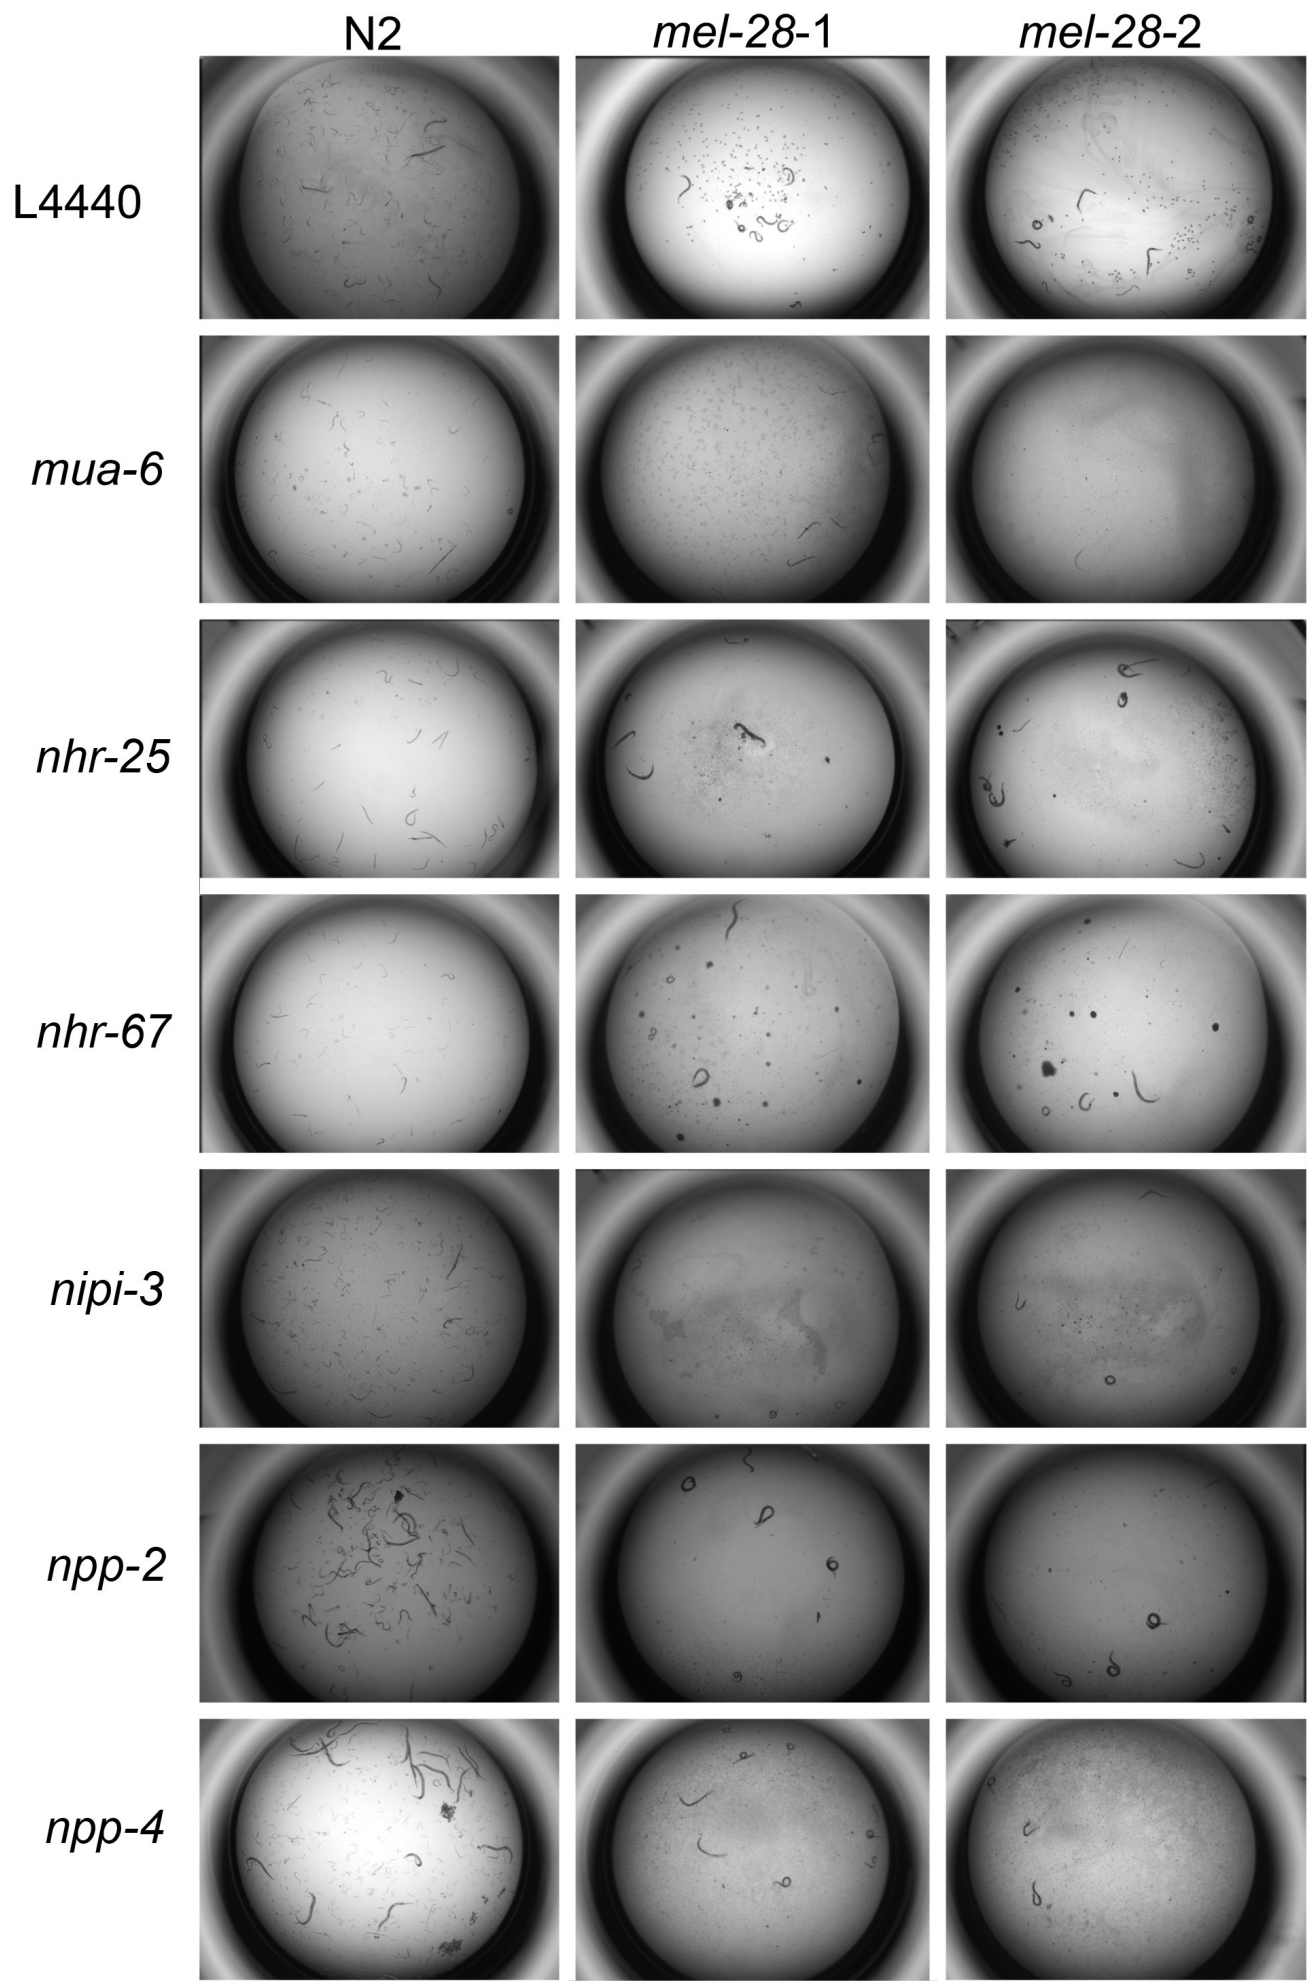

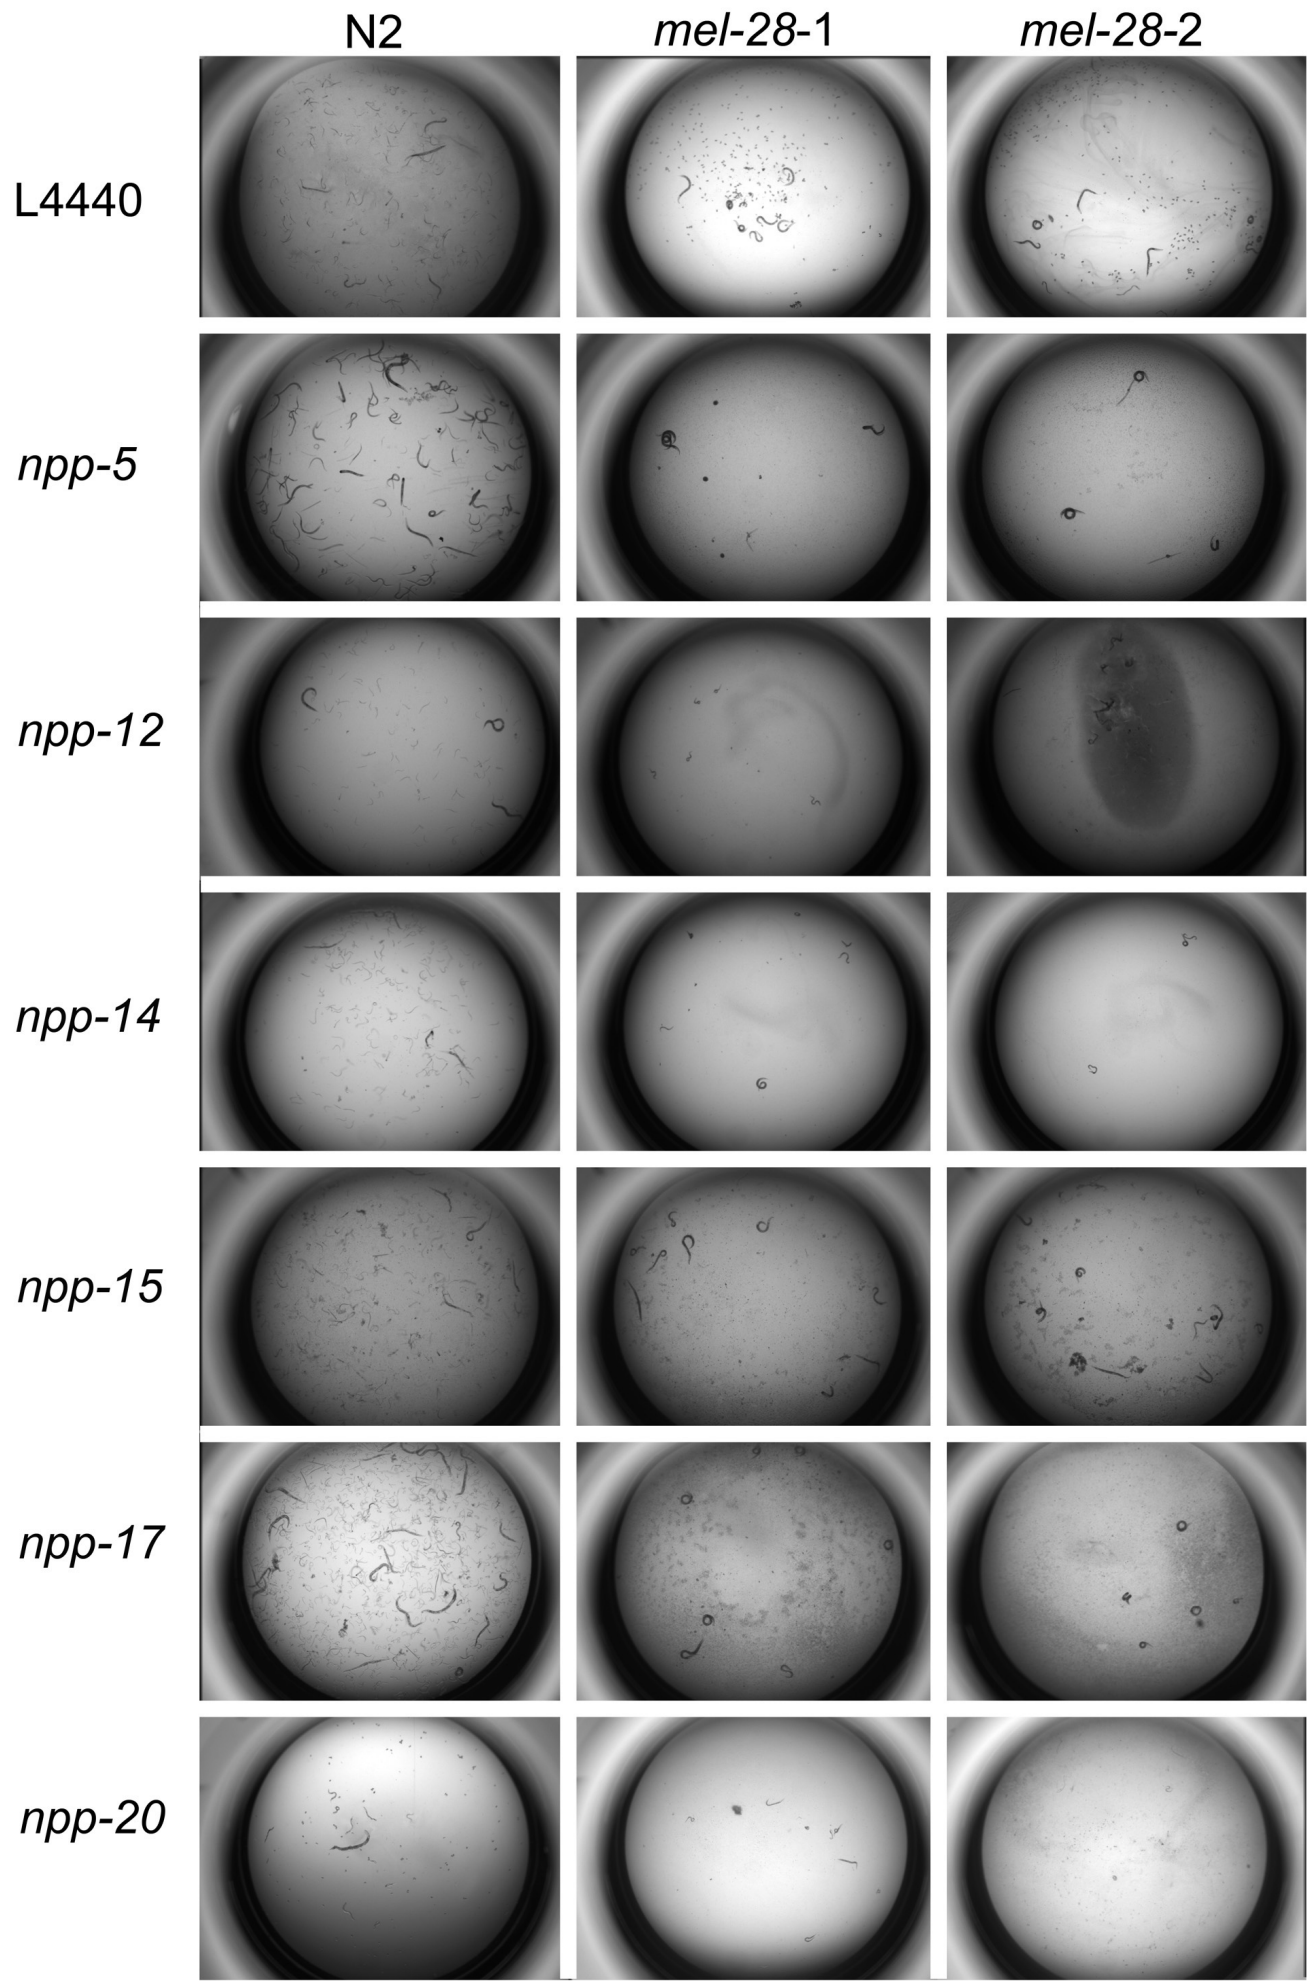

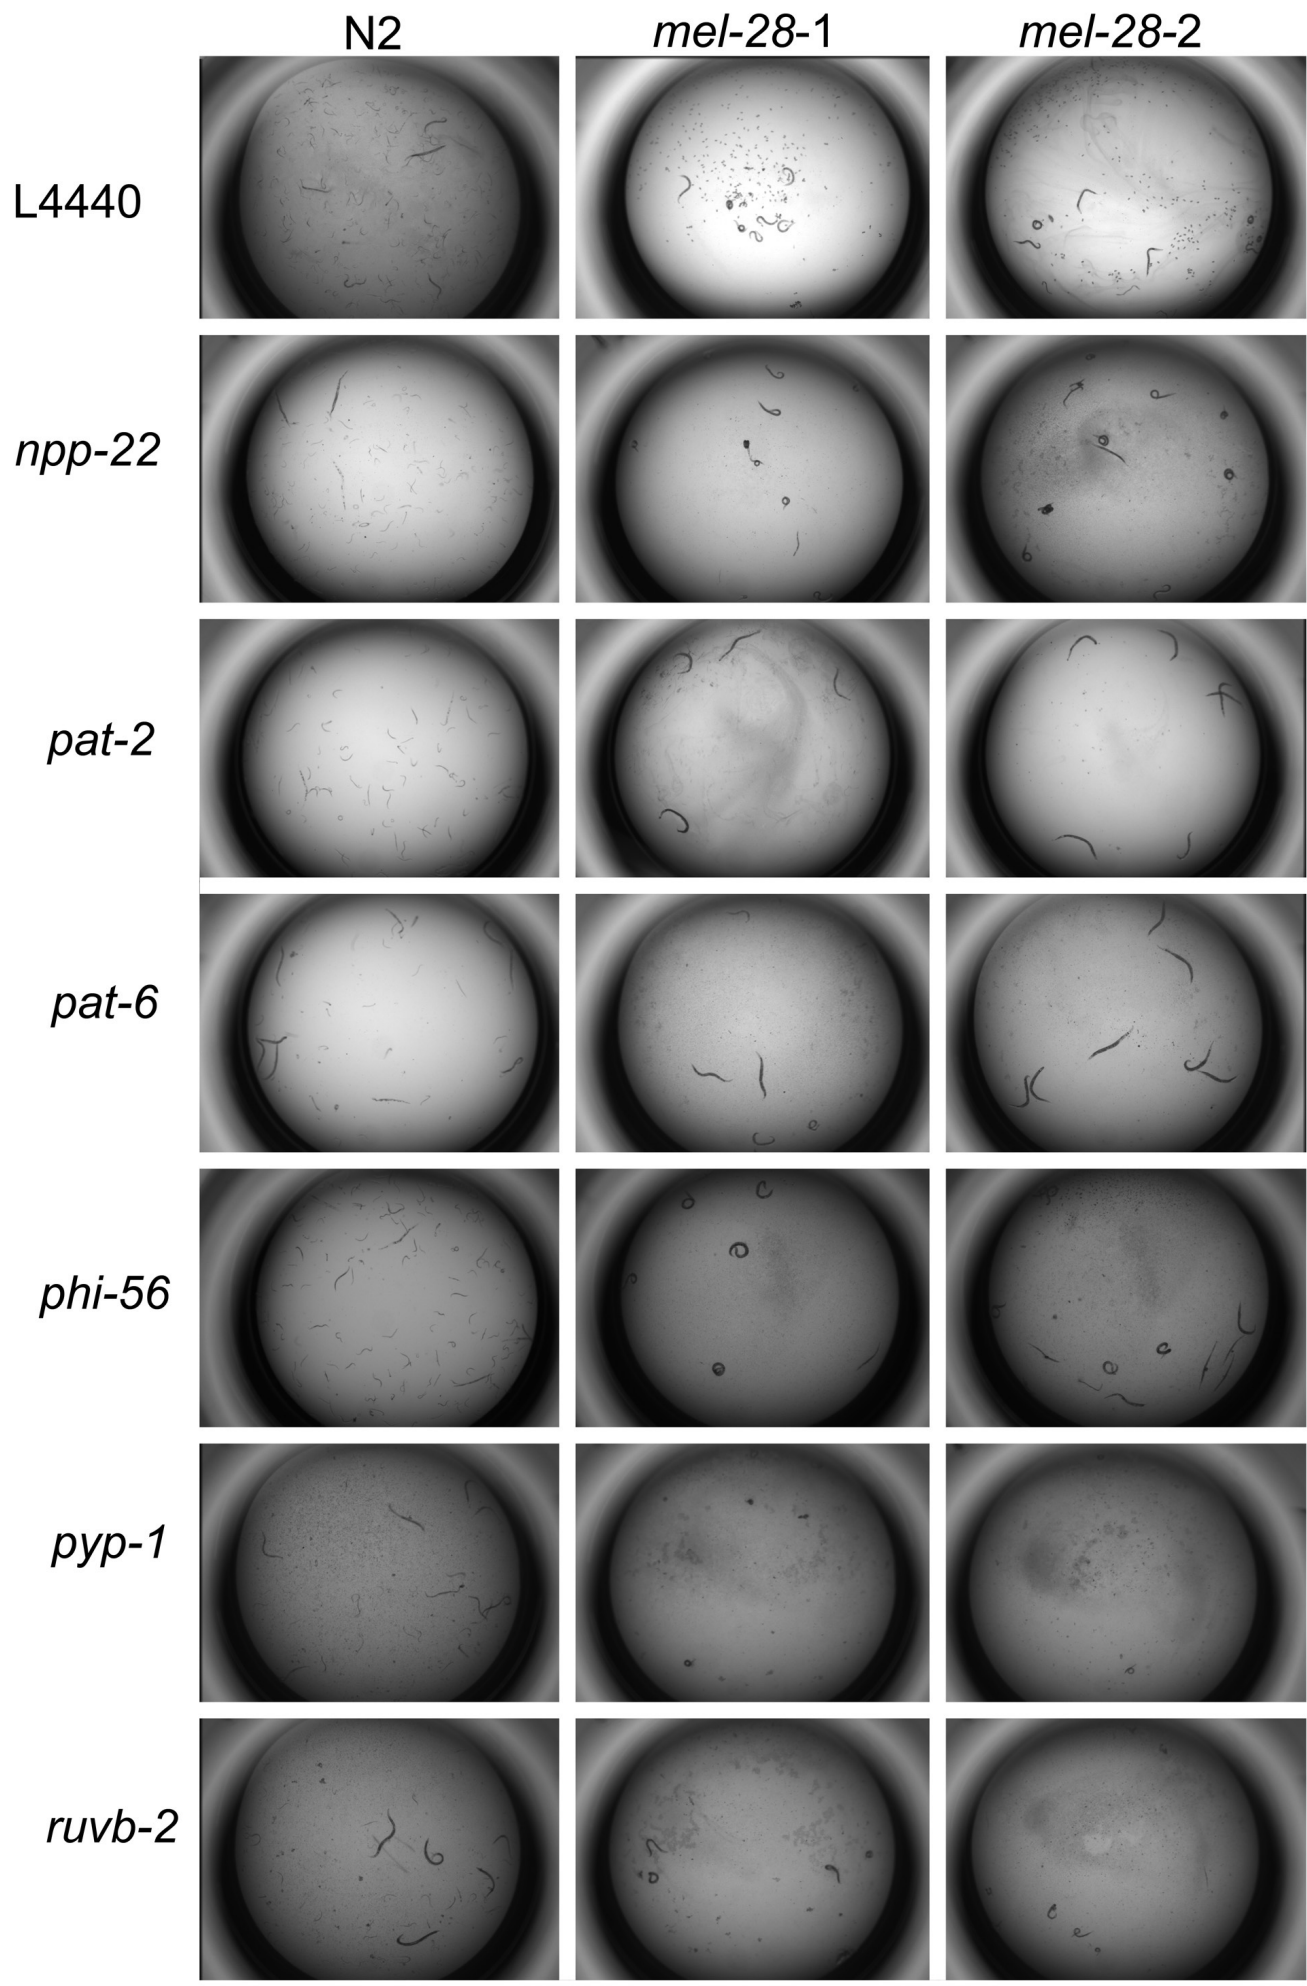



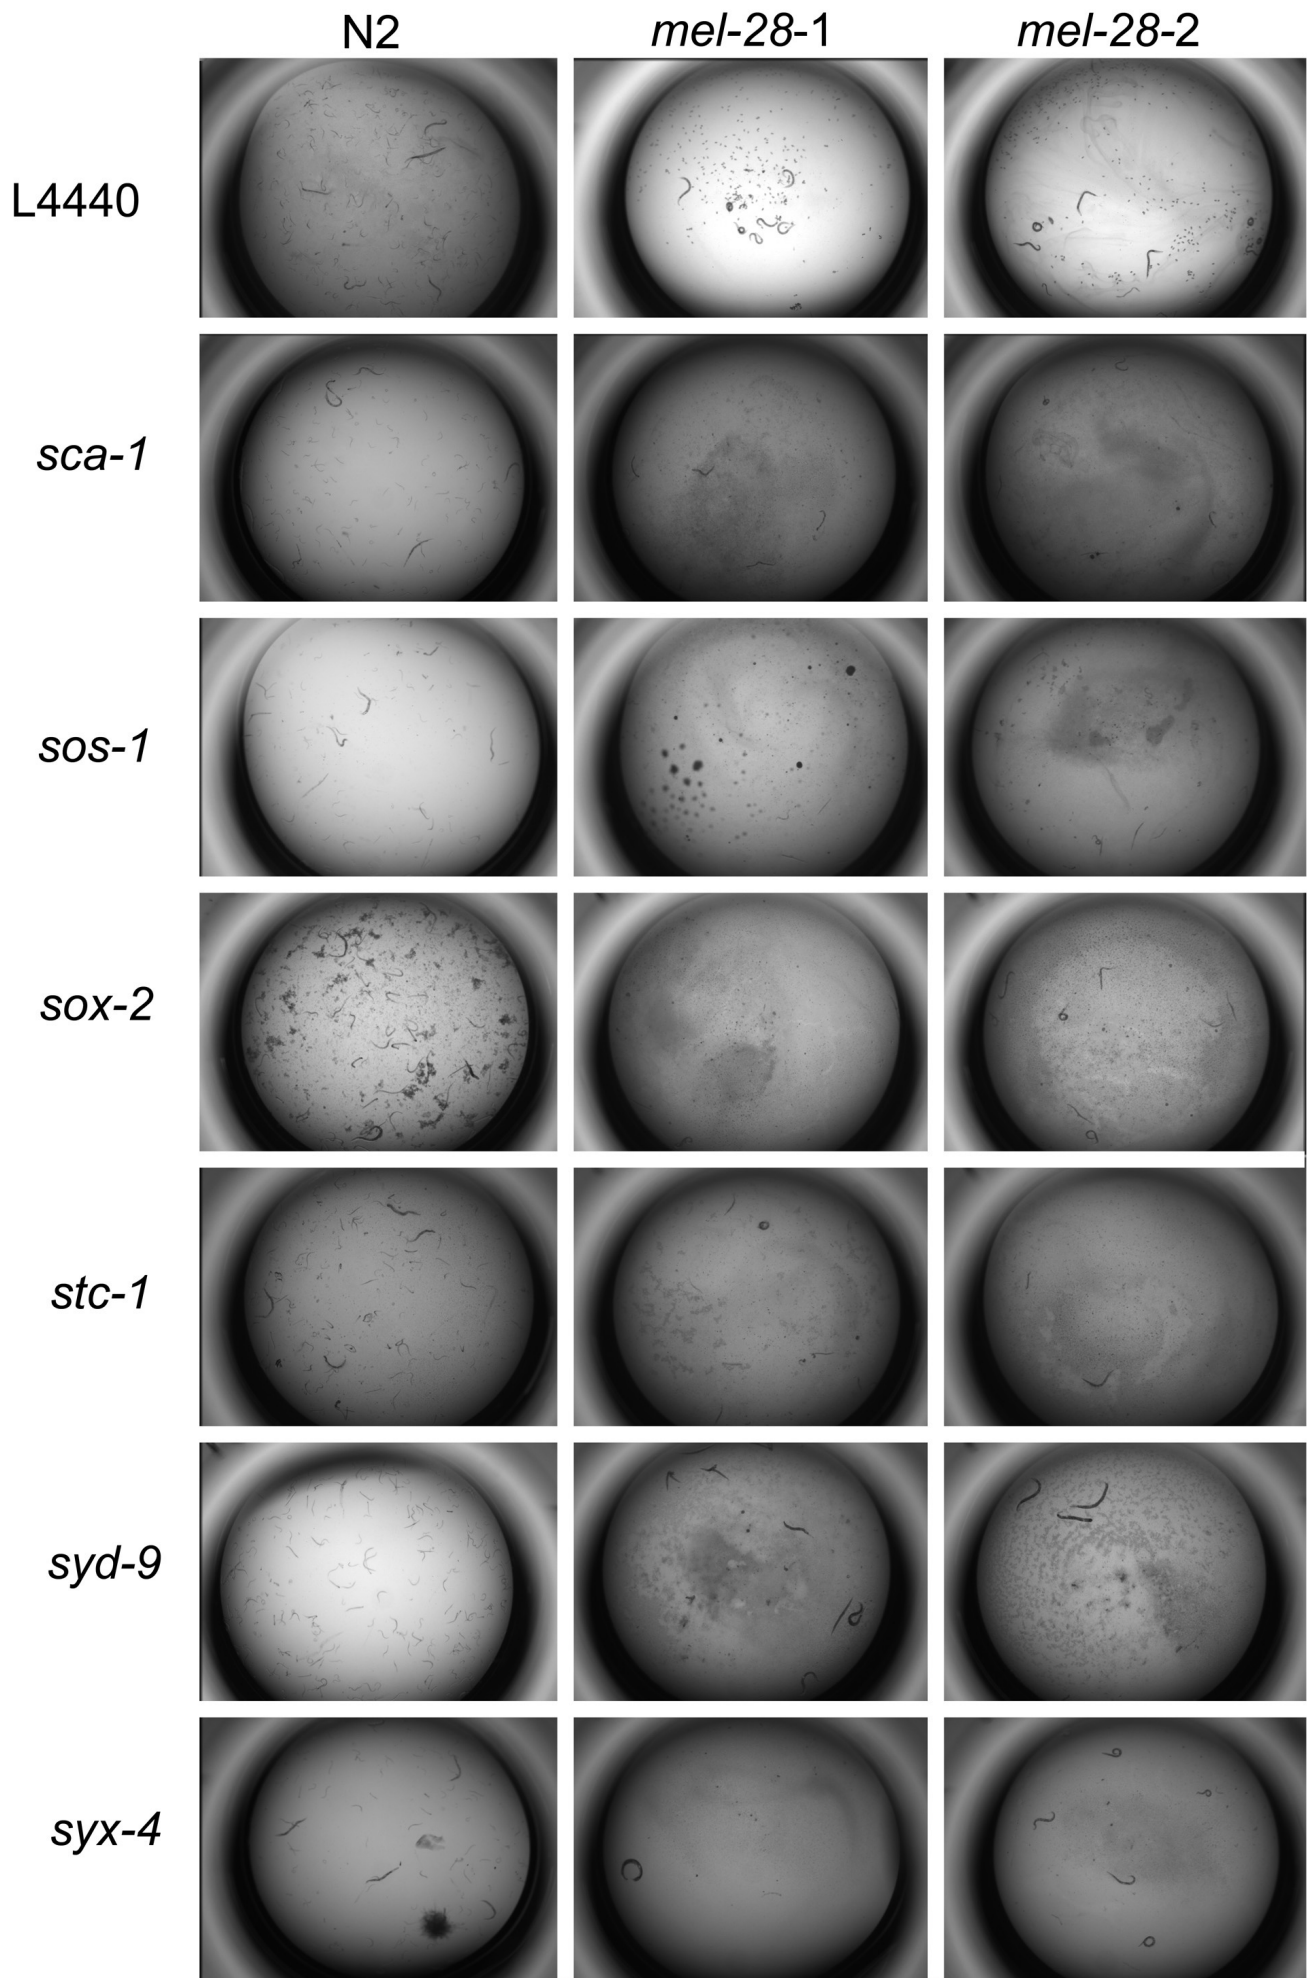

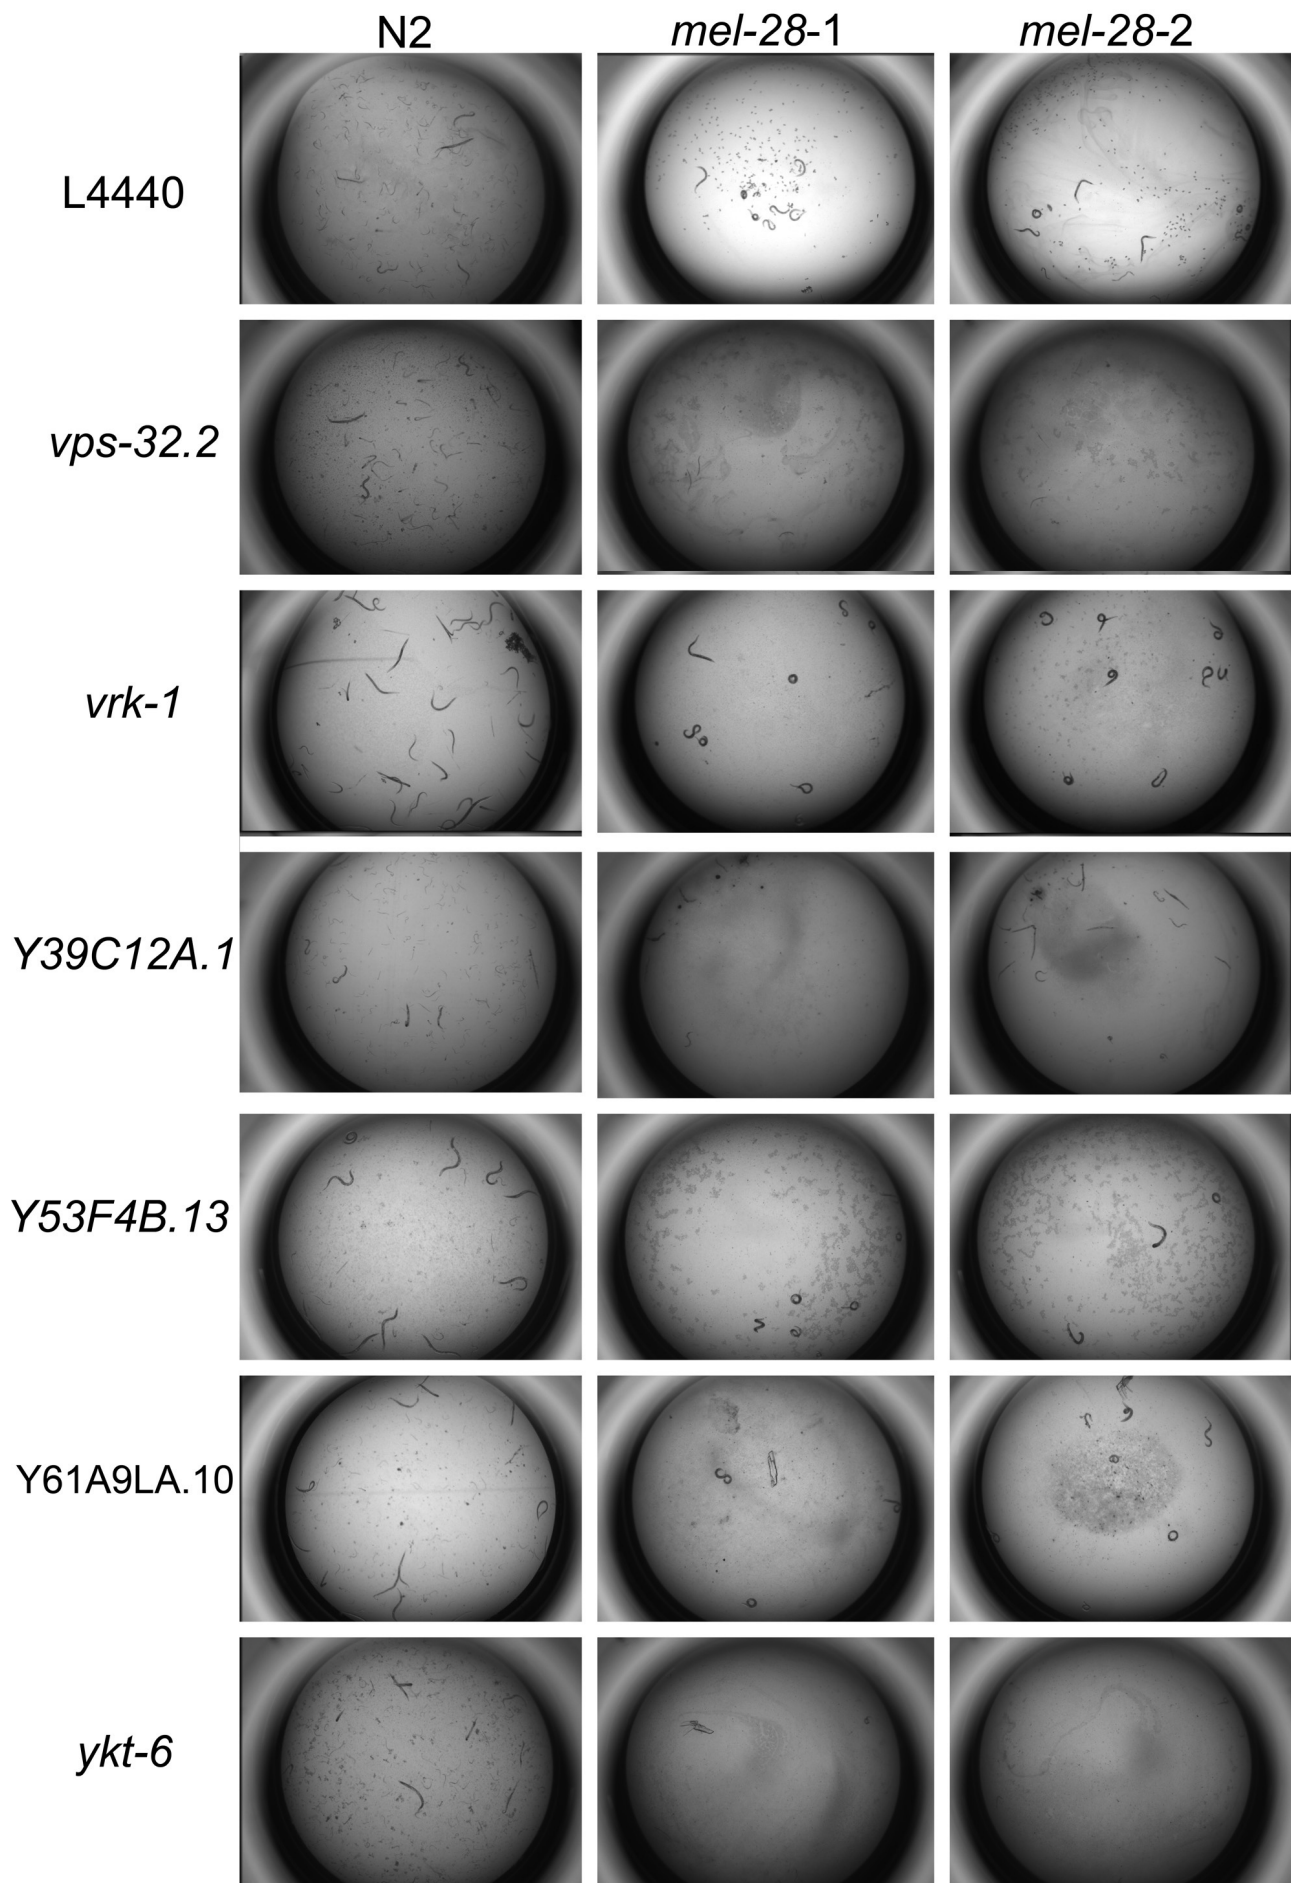

Figure S1 *mel-28* genetic interactor phenotypes
