# Supplementary material for: Uncovering Buffered Pleiotropy: A Genome-Scale Screen formel-28Genetic Interactors inCaenorhabditis elegans
Source: Oxford University Press journal article supplement (doi:10.1534/g3.113.008532), 2013-12-04
Supplement: 008532_tables1.pdf [file 008532_tables1.pdf]

**Table S1 Brood size data for *mel-28* genetic interactors**

| gene           | progeny/a<br>dult (N2) | eggs/ adult<br>( <i>mel-28</i> ) | ratio N2 brood size: <i>mel-28</i><br>brood size | genetic interaction |
|----------------|------------------------|----------------------------------|--------------------------------------------------|---------------------|
| <i>pat-2</i>   | 25.3                   | 0.8                              | 31.6                                             | synthetic sterility |
| <i>pat-6</i>   | 7.3                    | 0.8                              | 9.1                                              | enhancement         |
| <i>klf-3</i>   | 13.9                   | 0.0                              | >3                                               | synthetic sterility |
| <i>his-67</i>  | 9.9                    | 2.7                              | 3.7                                              | enhancement         |
| <i>his-68</i>  | 10.2                   | 0.0                              | >3                                               | enhancement         |
| <i>pyp-1</i>   | 2.8                    | 0.0                              | >3                                               | enhancement         |
| <i>ruvb-2</i>  | 9.5                    | 0.7                              | 13.6                                             | enhancement         |
| <i>dhc-1</i>   | 1.7                    | 0.0                              | >3                                               | enhancement         |
| <i>dyci-1</i>  | 4                      | 0.0                              | >3                                               | enhancement         |
| <i>dli-1</i>   | 16                     | 0.4                              | 40                                               | synthetic sterility |
| <i>dnc-1</i>   | 14.1                   | 0.6                              | 23.5                                             | synthetic sterility |
| <i>cap-1</i>   | 12                     | 0.6                              | 20                                               | enhancement         |
| <i>cap-2</i>   | 8.4                    | 1.4                              | 6                                                | enhancement         |
| <i>arp-1</i>   | 16.7                   | 1.8                              | 9.3                                              | synthetic sterility |
| <i>npp-2</i>   | 8.7                    | 0.7                              | 12.4                                             | enhancement         |
| <i>npp-4</i>   | 14.7                   | 0.0                              | >3                                               | synthetic sterility |
| <i>npp-5</i>   | 18.2                   | 1.8                              | 10.1                                             | synthetic sterility |
| <i>npp-12</i>  | 21.3                   | 0.3                              | 71                                               | synthetic sterility |
| <i>npp-14</i>  | 16.2                   | 0.0                              | >3                                               | synthetic sterility |
| <i>npp-15</i>  | 16                     | 0.0                              | >3                                               | synthetic sterility |
| <i>npp-17</i>  | 12.3                   | 0.3                              | 41                                               | enhancement         |
| <i>npp-20</i>  | 8.5                    | 0.0                              | >3                                               | enhancement         |
| <i>npp-22</i>  | 25                     | 0.0                              | >3                                               | synthetic sterility |
| <i>ima-3</i>   | 6                      | 0.0                              | >3                                               | enhancement         |
| <i>vrk-1</i>   | 4                      | 1.1                              | 3.6                                              | enhancement         |
| <i>lpin-1</i>  | 5                      | 0.0                              | >3                                               | enhancement         |
| <i>cct-2</i>   | 17.3                   | 0.2                              | 86.5                                             | synthetic sterility |
| <i>stc-1</i>   | 13.6                   | 1.3                              | 10.5                                             | synthetic sterility |
| <i>sca-1</i>   | 13.2                   | 0.0                              | >3                                               | synthetic sterility |
| <i>phi-56</i>  | 12.3                   | 0.0                              | >3                                               | enhancement         |
| <i>K12H4.4</i> | 11.8                   | 0.0                              | >3                                               | enhancement         |
| <i>ggtb-1</i>  | 2.6                    | 0.0                              | >3                                               | enhancement         |
| <i>ykt-6</i>   | 11.7                   | 1.0                              | 11.7                                             | enhancement         |
| <i>syx-4</i>   | 24.3                   | 0.4                              | 60.8                                             | synthetic sterility |
| <i>mua-6</i>   | 18.5                   | 0.7                              | 26.4                                             | synthetic sterility |
| <i>syd-9</i>   | 55                     | 0.2                              | 275                                              | synthetic sterility |

|                 |      |     |      |                     |
|-----------------|------|-----|------|---------------------|
| <i>arf-3</i>    | 4.2  | 0.0 | >3   | enhancement         |
| <i>hgrs-1</i>   | 17.8 | 0.0 | >3   | synthetic sterility |
| <i>vps-32.2</i> | 11.3 | 0.0 | >3   | enhancement         |
| Y61A9LA.10      | 9.4  | 0.0 | >3   | enhancement         |
| <i>eif-1</i>    | 3.7  | 0.0 | >3   | enhancement         |
| Y39C12A.1       | 20.8 | 0.7 | 29.7 | synthetic sterility |
| F52C6.2         | 16   | 1.8 | 8.9  | synthetic sterility |
| F52C6.3         | 14.7 | 0.0 | >3   | synthetic sterility |
| <i>exos-3</i>   | 11.2 | 3.0 | 3.7  | enhancement         |
| <i>alg-1</i>    | 4.9  | 0.0 | >3   | enhancement         |
| <i>cyd-1</i>    | 27.8 | 0.0 | >3   | synthetic sterility |
| <i>ego-2</i>    | 15   | 0.6 | 25   | synthetic sterility |
| <i>dre-1</i>    | 9.3  | 0.0 | >3   | enhancement         |
| <i>nipi-3</i>   | 8.1  | 1.0 | 8.1  | enhancement         |
| <i>hmgs-1</i>   | 15.7 | 0.0 | >3   | synthetic sterility |
| <i>nhr-25</i>   | 17.1 | 0.0 | >3   | synthetic sterility |
| <i>nhr-67</i>   | 23.3 | 0.0 | >3   | synthetic sterility |
| <i>apl-1</i>    | 32   | 0.0 | >3   | synthetic sterility |
| F19B6.1         | 15.6 | 0.0 | >3   | synthetic sterility |
| C55A6.9         | 6.8  | 0.2 | 34   | enhancement         |
| <i>egl-13</i>   | 25   | 0.0 | >3   | synthetic sterility |
| <i>sox-2</i>    | 17   | 0.0 | >3   | synthetic sterility |
| <i>gei-13</i>   | 15   | 0.4 | 37.5 | synthetic sterility |
| Y53F4B.13       | 3.8  | 0.0 | >3   | enhancement         |
| <i>lin-3</i>    | 26.7 | 0.7 | 38.1 | synthetic sterility |
| <i>arx-2</i>    | 27.2 | 0.0 | >3   | synthetic sterility |
| <i>eat-6</i>    | 10.9 | 0.0 | >3   | enhancement         |
| B0250.7         | 3.8  | 1.0 | 3.8  | enhancement         |
| <i>sos-1</i>    | 7.8  | 0.0 | >3   | enhancement         |

---

For each strain (N2 or *mel-28*) the number of progeny per adult was tallied. We did this by adding up the total number of mothers and dividing this number by the total number of progeny from at least two RNAi experiments. For the *dhc-1* gene these tallies came from a single RNAi experiment (see methods for details).
