# Supplementary material for: Uncovering Buffered Pleiotropy: A Genome-Scale Screen formel-28Genetic Interactors inCaenorhabditis elegans
Source: Oxford University Press journal article supplement (doi:10.1534/g3.113.008532), 2013-12-04
Supplement: 008532_tables2.pdf [file 008532_tables2.pdf]

**Table S2 GO-enriched terms amongst *mel-28* genetic interactors**

| N  | P value  | GO attribute ID | GO attribute name                                  |
|----|----------|-----------------|----------------------------------------------------|
| 2  | 2.04E-05 | GO:0008290      | F-actin capping protein complex                    |
| 2  | 6.11E-05 | GO:0005787      | signal peptidase complex                           |
| 3  | 1.06E-05 | GO:0005869      | dynactin complex                                   |
| 7  | 2.39E-11 | GO:0005643      | nuclear pore                                       |
| 3  | 1.92E-05 | GO:0051028      | mRNA transport                                     |
| 7  | 6.97E-11 | GO:0046930      | pore complex                                       |
| 10 | 5.02E-13 | GO:0005635      | nuclear envelope                                   |
| 5  | 3.34E-06 | GO:0006997      | nucleus organization                               |
| 5  | 2.25E-05 | GO:0007338      | single fertilization                               |
| 5  | 2.73E-05 | GO:0009566      | fertilization                                      |
| 10 | 2.10E-08 | GO:0031967      | organelle envelope                                 |
| 10 | 2.20E-08 | GO:0031975      | envelope                                           |
| 12 | 2.05E-09 | GO:0012505      | endomembrane system                                |
| 7  | 1.07E-05 | GO:0051656      | establishment of organelle localization            |
| 7  | 1.30E-05 | GO:0051640      | organelle localization                             |
| 7  | 2.82E-05 | GO:0032940      | secretion by cell                                  |
| 7  | 3.11E-05 | GO:0046903      | secretion                                          |
| 8  | 2.83E-05 | GO:0015031      | protein transport                                  |
| 11 | 1.16E-06 | GO:0044428      | nuclear part                                       |
| 8  | 3.15E-05 | GO:0045184      | establishment of protein localization              |
| 14 | 6.34E-08 | GO:0051649      | establishment of localization in cell              |
| 14 | 1.62E-07 | GO:0051641      | cellular localization                              |
| 21 | 7.91E-10 | GO:0043234      | protein complex                                    |
| 20 | 2.37E-09 | GO:0006898      | receptor-mediated endocytosis                      |
| 11 | 8.38E-06 | GO:0008104      | protein localization                               |
| 40 | 9.36E-12 | GO:0040007      | growth                                             |
| 20 | 2.91E-08 | GO:0006897      | endocytosis                                        |
| 21 | 3.49E-08 | GO:0016192      | vesicle-mediated transport                         |
| 42 | 7.57E-11 | GO:0009792      | embryo development ending in birth or egg hatching |
| 23 | 1.75E-08 | GO:0044422      | organelle part                                     |
| 21 | 6.33E-08 | GO:0044446      | intracellular organelle part                       |
| 21 | 6.69E-08 | GO:0032991      | macromolecular complex                             |
| 42 | 1.80E-10 | GO:0009790      | embryo development                                 |
| 33 | 6.12E-09 | GO:0002119      | nematode larval development                        |
| 33 | 6.24E-09 | GO:0002164      | larval development                                 |
| 33 | 7.71E-09 | GO:0009791      | post-embryonic development                         |

|    |          |            |                                           |
|----|----------|------------|-------------------------------------------|
| 31 | 1.40E-08 | GO:0051234 | establishment of localization             |
| 30 | 2.70E-08 | GO:0006810 | transport                                 |
| 44 | 3.85E-08 | GO:0048856 | anatomical structure development          |
| 46 | 7.61E-08 | GO:0007275 | multicellular organismal development      |
| 45 | 1.52E-07 | GO:0044767 | single-organism developmental process     |
| 24 | 2.20E-06 | GO:0040010 | positive regulation of growth rate        |
| 24 | 2.26E-06 | GO:0040009 | regulation of growth rate                 |
| 34 | 2.33E-07 | GO:0051179 | localization                              |
| 26 | 1.56E-06 | GO:0040011 | locomotion                                |
| 46 | 5.04E-07 | GO:0032502 | developmental process                     |
| 46 | 1.46E-06 | GO:0044707 | single-multicellular organism process     |
| 25 | 6.07E-06 | GO:0045927 | positive regulation of growth             |
| 46 | 3.83E-06 | GO:0032501 | multicellular organismal process          |
| 19 | 7.29E-05 | GO:0005515 | protein binding                           |
| 25 | 1.35E-05 | GO:0040008 | regulation of growth                      |
| 27 | 1.21E-05 | GO:0048518 | positive regulation of biological process |
| 33 | 5.12E-06 | GO:0000003 | reproduction                              |
| 30 | 5.50E-05 | GO:0043229 | intracellular organelle                   |
| 30 | 5.63E-05 | GO:0043226 | organelle                                 |

---

We used FuncAssociate ([http://llama.mshri.on.ca/funcassociate\\_client/html/](http://llama.mshri.on.ca/funcassociate_client/html/)) to determine the GO term enrichment within the list of 65 *mel-28* genetic interactors identified. The background set was the entire *C. elegans* genome.
